# Supplementary material
Source: publisher figshare collection journal article supplement (https://acs.figshare.com/ndownloader/files/7785922)
Supplement: Supplementary file 1 [file 7785922]

## Supplementary Information

### Land use regression models for Ultrafine Particles in six European areas

Erik van Nunen<sup>1\*</sup>, Roel Vermeulen<sup>1</sup>, Ming-Yi Tsai<sup>2,3,4</sup>, Nicole Probst-Hensch<sup>2,3</sup>, Alex Ineichen<sup>2,3</sup>, Mark Davey<sup>2,3</sup>, Medea Imboden<sup>2,3</sup>, Regina Ducret-Stich<sup>2,3</sup>, Alessio Naccarati<sup>5</sup>, Daniela Raffaele<sup>5</sup>, Andrea Ranzi<sup>6</sup>, Cristiana Ivaldi<sup>7</sup>, Claudia Galassi<sup>8</sup>, Mark Nieuwenhuijsen<sup>9,10,11</sup>, Ariadna Curto<sup>9,10,11</sup>, David Donaire-Gonzalez<sup>9,10,11</sup>, Marta Cirach<sup>9,10,11</sup>, Leda Chatzi<sup>12</sup>, Mariza Kampouri<sup>12</sup>, Jelle Vlaanderen<sup>1</sup>, Kees Meliefste<sup>1</sup>, Daan Buijtenhuijs<sup>1</sup>, Bert Brunekreef<sup>1</sup>, David Morley<sup>13</sup>, Paolo Vineis<sup>5,13</sup>, John Gulliver<sup>13</sup>, Gerard Hoek<sup>1</sup>

[1] Institute for Risk Assessment Sciences (IRAS), division of Environmental Epidemiology (EEPI), Utrecht University, Utrecht, the Netherlands

[2] Swiss Tropical and Public Health (TPH) Institute, University of Basel, Basel, Switzerland

[3] University of Basel, Basel, Switzerland

[4] Department of Environmental and Occupational Health Sciences, University of Washington, Seattle, WA USA

[5] Human Genetics Foundation, Turin, Italy

[6] Environmental Health Reference Centre, Regional Agency for Prevention, Environment and Energy of Emilia-Romagna, Modena, Italy

[7] ARPA Piemonte, Turin, Italy

[8] Unit of Cancer Epidemiology, Citta' della Salute e della Scienza University Hospital and Centre for Cancer Prevention, Turin, Italy

[9] ISGlobal, Centre for Research in Environmental Epidemiology (CREAL), Barcelona, Spain

[10] Department of Experimental and Health Sciences, Pompeu Fabra University (UPF), Barcelona, Spain

[11] CIBER Epidemiologia y Salud Pública (CIBERESP), Barcelona, Spain

[12] Department of Social Medicine, University of Crete, Heraklion, Greece

[13] MRC-PHE Centre for Environment and Health, Department of Epidemiology and Biostatistics, Imperial College London, St Mary's Campus, London, United Kingdom

\* Corresponding author

Institute for Risk Assessment Sciences (IRAS), division of Environmental Epidemiology (EEPI), Utrecht University, Yalelaan 2, 3584 CM Utrecht, the Netherlands; Tel +31 30 253 9474; Fax +31 30 253 9499; e-mail address: [e.vannunen@uu.nl](mailto:e.vannunen@uu.nl)

For submission to ES&T:

Pages: 35

Figures: 7

Tables: 9

## Supplement 1: Study areas and site distributions

All study areas covered in the EXPOsOMICS short-term campaign are presented in the map below along with the distribution of monitoring sites per area.

**Figure S1;** Map of Europe highlighting study areas.

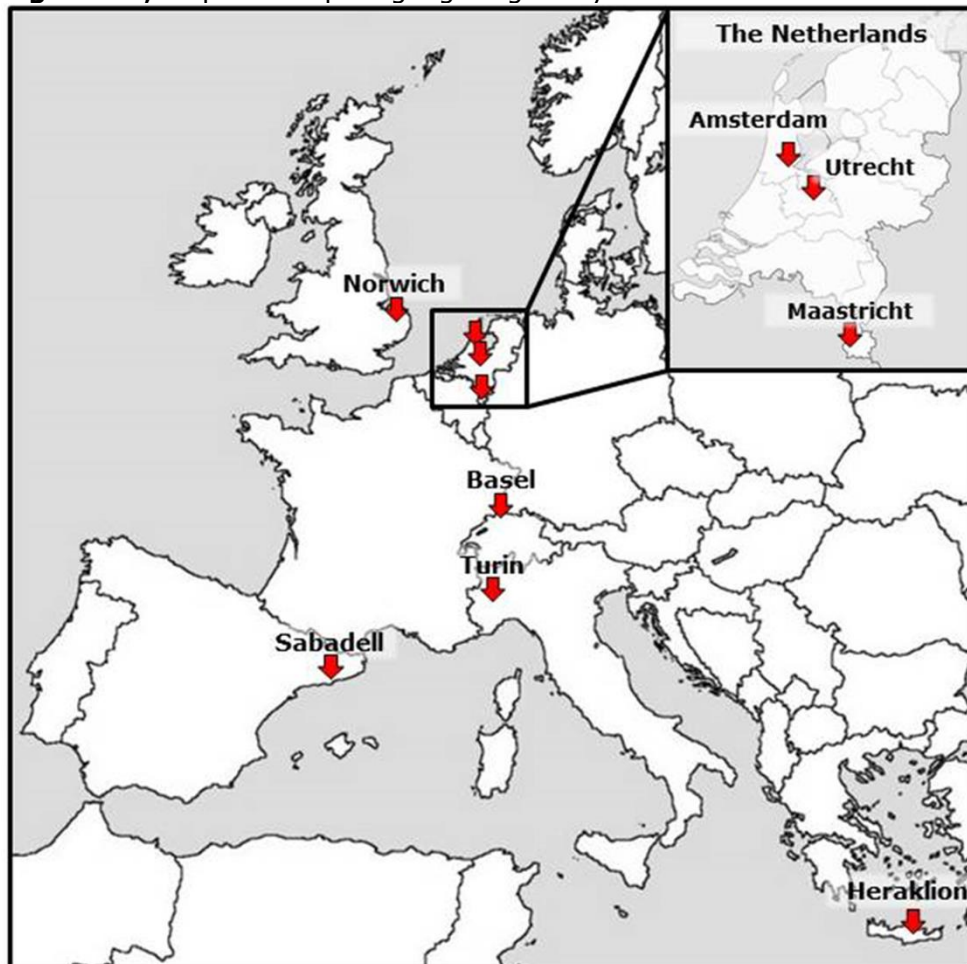

**Figure S2;** Detailed study area maps and distribution of monitoring sites.

A) Basel (Switzerland)

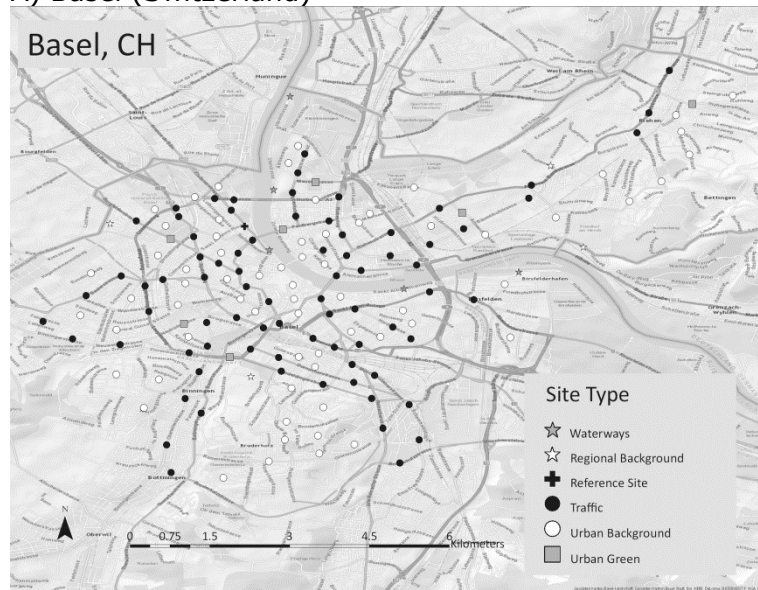

B) Heraklion (Greece)

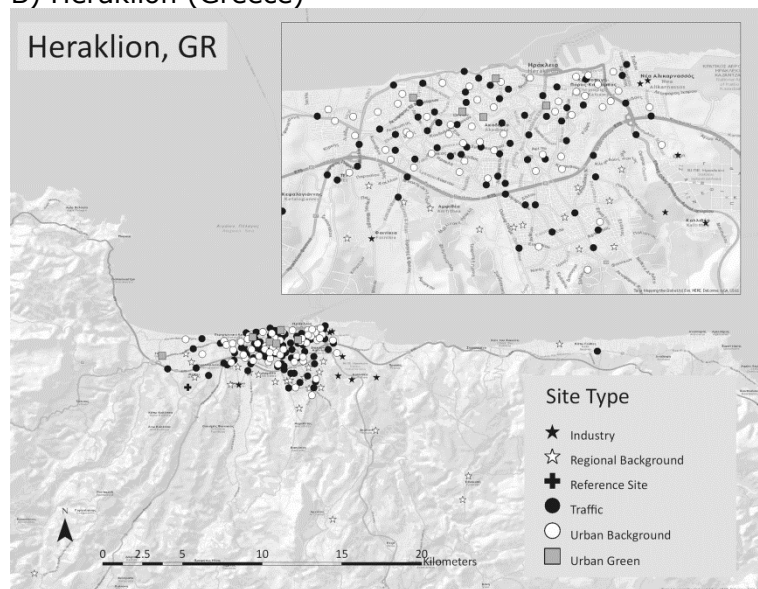

C) The Netherlands (Amsterdam, Maastricht and Utrecht)

Amsterdam, NL

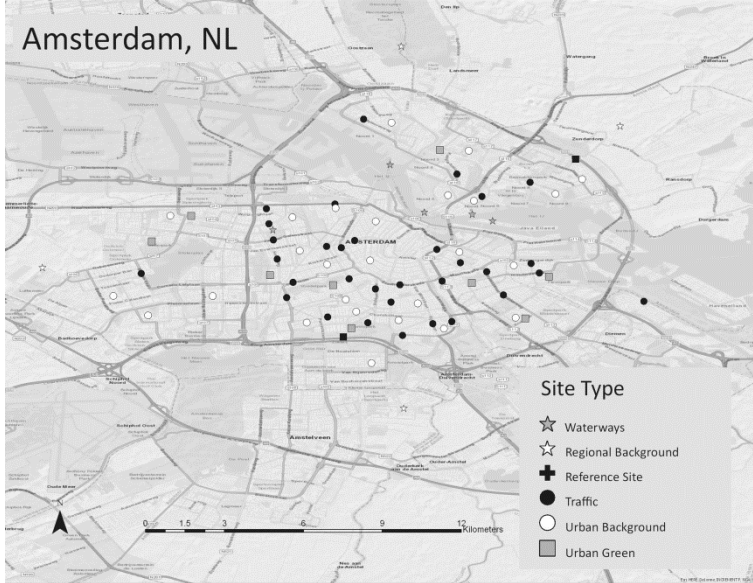

Maastricht, NL

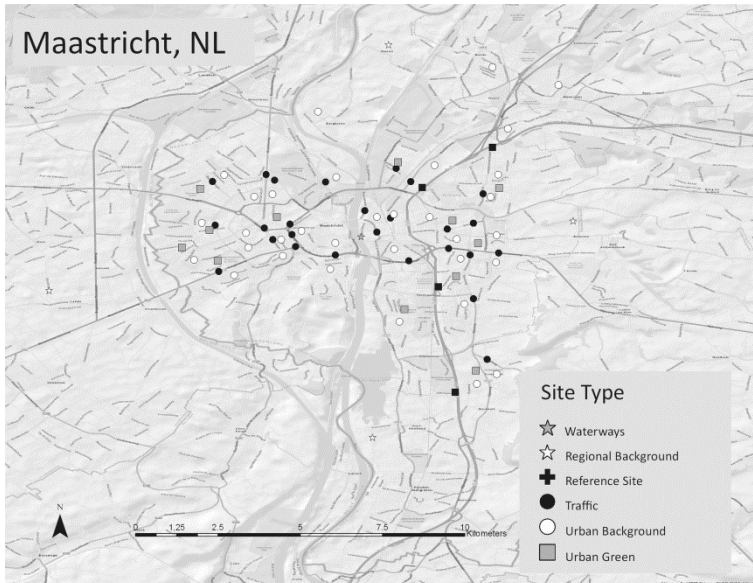

Utrecht, NL

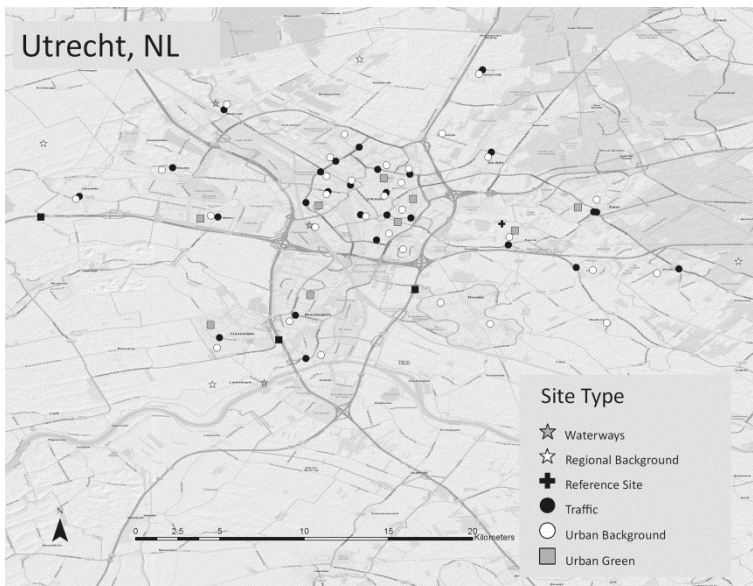

D) Norwich (United Kingdom)

Norwich, UK

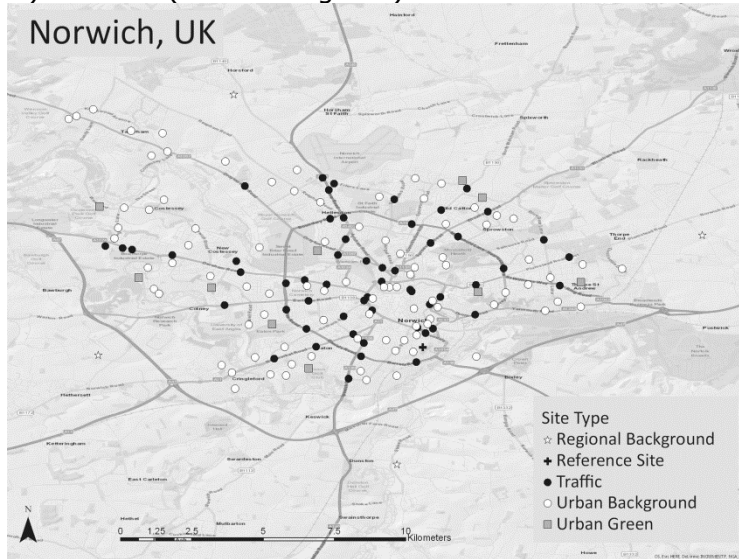

E) Sabadell (Spain)

Sabadell, SP

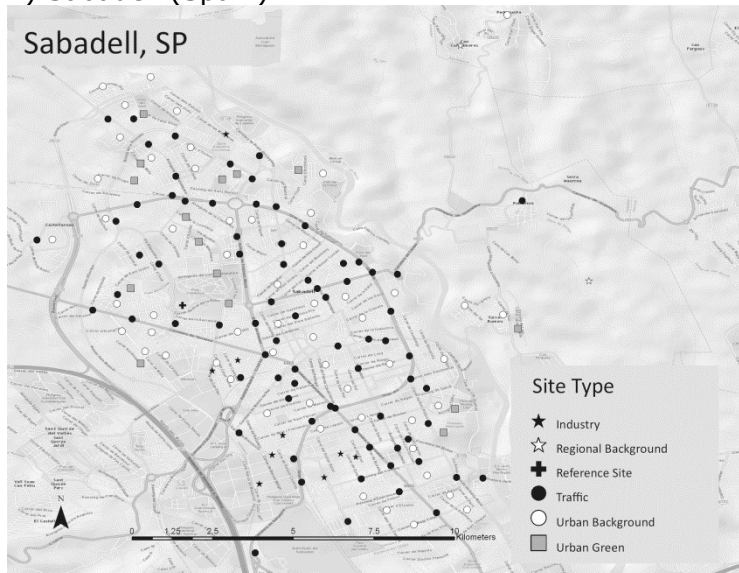

F) Turin (Italy)

Turin, IT

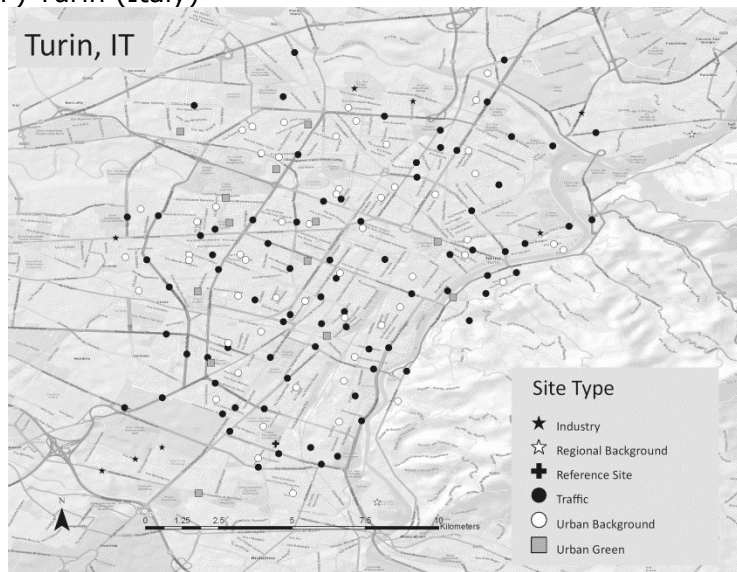

## Supplement 2: Co-location of UFP monitors in study areas.

In each study area two instruments were used, one for sampling the 160 (or 240) sites and one at the reference site. To evaluate consistency in UFP levels, devices were co-located in each area during the short-term monitoring campaign regularly for at least 180 minutes per comparison. In all study areas, the CPC 3007 (TSI Inc., Tennessee, USA) was used for monitoring the 160 (or 240) sites. In the Netherlands and Heraklion, another CPC3007 instrument was used at the reference site, while in the other four areas the MiniDiSC (Testo AG, Lenzkirch, Germany) was used at the reference site. Table S1 and Figure S1 present the results of the comparisons, expressed as the ratio of the UFP measurements with the instrument used at the sampling site and the instrument at the reference site. In the Netherlands, Norwich and Sabadell, the ratios of two instruments were close to unity. In Turin, the CPC used at the short-term sites gave about 30% lower readings than the MiniDiSC used at the reference site. We did not correct the measurements for these modest differences, as the reference site measurements is used only to correct for temporal variation using difference of the reference site measurement in a specific 30-minute period and the overall average. In Heraklion, the monitoring site CPC gave higher UFP readings than the reference site CPC with large variation. No trend over time was present. We did not correct the inconsistent comparisons, leading to added uncertainty of the correction for temporal variation.

**Table S1;** Agreement between monitoring devices

| <b>Study area</b> | <b>Comparison</b>      | <b>Mean (SD) ratio<sup>a</sup></b> |
|-------------------|------------------------|------------------------------------|
| Heraklion         | CPC – CPC              | 1.41 (0.40)                        |
| Netherlands       | CPC – CPC <sup>b</sup> | 1.09 (0.16)                        |
| Norwich           | CPC – Minidisc         | 1.02 (0.14)                        |
| Sabadell          | CPC – Minidisc         | 0.86 (0.11)                        |
| Turin             | CPC – Minidisc         | 0.73 (0.06)                        |

<sup>a</sup> UFP instrument at monitoring sites / reference site

<sup>b</sup> Three comparisons of ref site CPC and a Minidisc resulted in a mean ratio of ~1

**Figure S3; Co-location performed per study area, presented by average ratio per exercise (min. 180 minutes)  
Heraklion**

Average Ratio between reported UFP by the CPC from the mobile campaign and CPC at the reference site

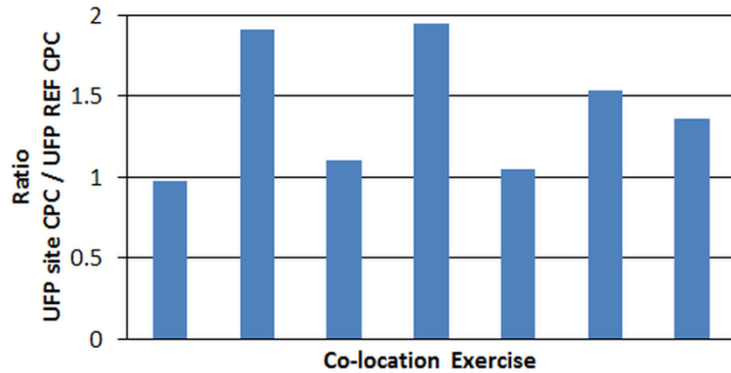

**The Netherlands**

Average Ratio between reported UFP by the CPC from the mobile campaign and CPC at the reference site (A)

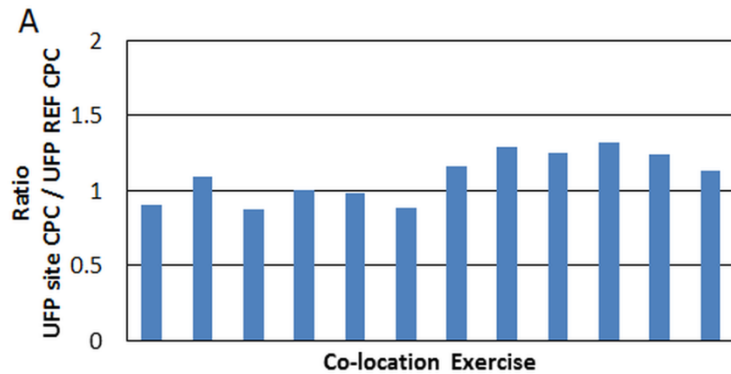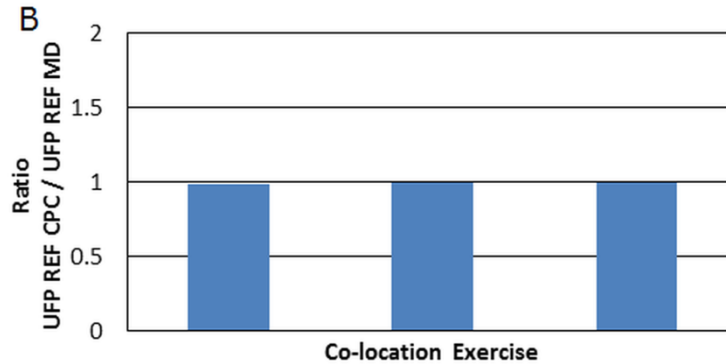

Average Ratio between reported UFP by the CPC from the reference site and MiniDiSC (MD) at the reference site (B)



### Norwich

Average Ratio between reported UFP by the CPC from the mobile campaign and MiniDiSC (MD) at the reference site

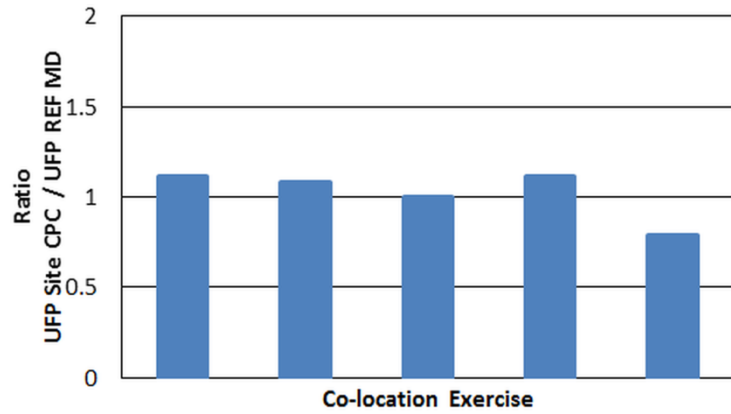

### Sabadell

Average Ratio between reported UFP by the CPC from the mobile campaign and MiniDiSC (MD) at the reference site

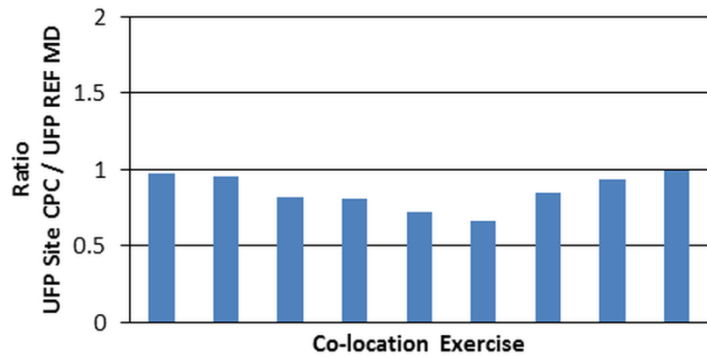

## Turin

Average Ratio between reported UFP by the CPC from the mobile campaign and MiniDiSC (MD) at the reference site

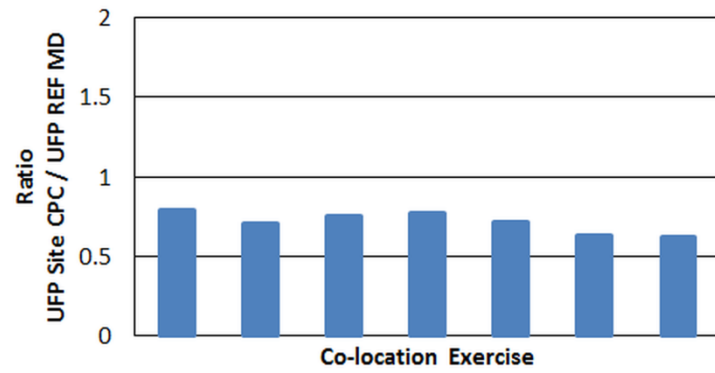

### Supplement 3: Regression models applied to calculate missing Reference Site UFP observations.

Missing 30 minute reference site UFP measurements arose in all study areas due to cleaning of spurious UFP readings, removal of device reported error messages and mismatches in monitoring times. These missing 30-minute values were imputed per area by applying regression models built on routine air pollution and meteorological data, using available 30-minute reference site UFP observations as dependent variable. The default was to use linear regression models. When model  $R^2$  exceeded 50%, regression models were accepted for prediction of reference UFP concentrations. Only in Torino, the model  $R^2$  of linear models exceeded 50%. In Norwich linear regression models achieved an  $R^2$  just below 50%. As the number of missing data was appreciable, a random forest model was then applied which achieved a  $R^2$  of 50%. In the other three areas, the  $R^2$  of linear models was below 6% and no further modelling was attempted.

#### Norwich

Reference site UFP observations were missing for 78/480 site measurements (16.5%).

Routine and Meteorological data were applied in a Random Forest regression model, explaining 50.2% in UFP variation for 402 available observations.

**Figure S4;** Output Random Forrest Regression

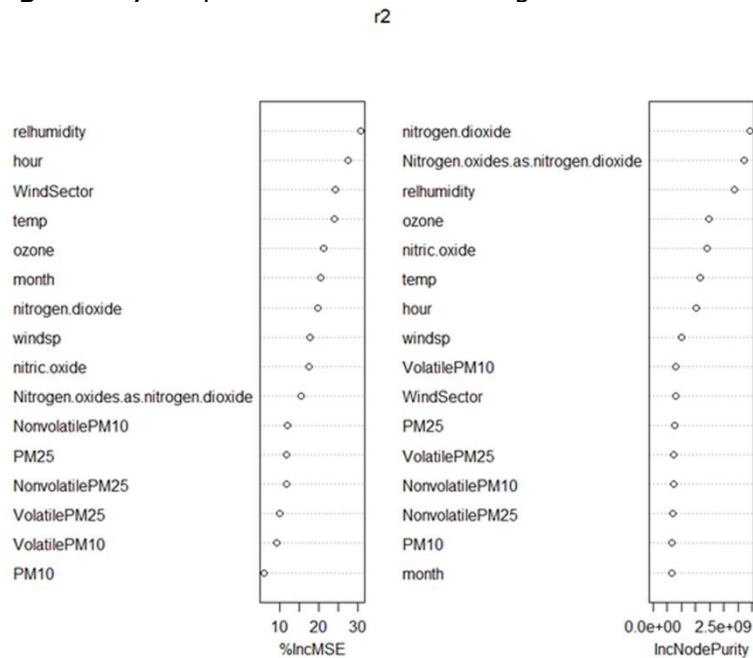

### *Turin*

Reference site UFP observations were missing for 313/480 measurements (65.2%).

Routine and Meteorological data were applied in a linear regression model, explaining 62.1% in UFP variation for 167 available observations.

312/313 reference site UFP values could be imputed by applying the model below, routine NOx was missing for one 30 minute interval.

$$\text{Reference UFP (cm}^{-3}\text{)} = 3.860\text{e}+05 + 9.800\text{e}+01 * \text{Routine NOx } (\mu\text{g/m}^3) - 1.391\text{e}+03 * \text{Hour} - 3.597\text{e}+00 * \text{Barometric Pressure (0.1hPa)} - 8.701\text{e}+01 * \text{Relative Humidity (\%)}$$

### *Basel*

Reference site UFP observations were missing for 36/480 measurements (7.5%).

Routine and Meteorological data could not explain 30-minute UFP observations for the 444 available observations in a regression model, where the highest observed R<sup>2</sup> for a single predictor reached 0.3%.

### *Heraklion*

Reference site UFP observations were missing for 85/480 measurements (17.7%).

Routine and Meteorological data could not explain 30-minute UFP observations for the 395 available observations in a regression model, where the highest observed R<sup>2</sup> for a single predictor did not exceed 2%.

### *The Netherlands*

Reference site UFP observations were missing for 48/723 measurements (6.6%).

Routine and Meteorological data could not explain 30-minute UFP observations for the 675 available observations in a regression model, where the highest observed R<sup>2</sup> for a single predictor reached 5.7%.

### *Sabadell*

Reference site UFP observations were missing for 31/480 measurements (6.5%).

Routine and Meteorological data could not explain 30-minute UFP observations for the 449 available observations in a regression model, where the highest observed R<sup>2</sup> for a single predictor reached 3.8%.

#### Supplement 4: GIS predictors for Land Use Regression Modelling in the EXPOsOMICS study.

- Starting point are the GIS predictors previously applied in the MUSIC study (Montagne et al. 2015). For predictor deletions and additions ESCAPE predictors were also evaluated (Eeftens, Beelen, et al. 2012). Airport was added as buffer rather than distance, which is difficult to define given the large area an airport covers.  
Restaurant density was added as number of amenities in a buffer radius given that restaurant data consisted of both spot and polygon data.
- Buffer sizes have been adapted to the sizes for which there were sufficient numbers of non-zero values expected.

**TableS2;** overview GIS predictors

| Predictor Variable                           | Variable Name | Units                  | Direction | Buffer sizes (m)          |
|----------------------------------------------|---------------|------------------------|-----------|---------------------------|
| <b>SPATIAL PREDICTORS</b>                    |               |                        |           |                           |
| <b>CORINE land use predictors</b>            |               |                        |           |                           |
| Industry                                     | INDUSTRY      | m <sup>2</sup>         | +         | 100, 300, 500, 1000, 5000 |
| Port                                         | PORT          | m <sup>2</sup>         | +         | 100, 300, 500, 1000, 5000 |
| Airport                                      | AIRPORT       | m <sup>2</sup>         | +         | 1000, 5000                |
| Urban Green                                  | URBGREEN      | m <sup>2</sup>         | -         | 100, 300, 500, 1000, 5000 |
| Semi-natural and forested areas              | NATURAL       | m <sup>2</sup>         | -         | 100, 300, 500, 1000, 5000 |
| Low density residential land                 | LDRES         | m <sup>2</sup>         | +         | 100, 300, 500, 1000, 5000 |
| High density residential land                | HDRES         | m <sup>2</sup>         | +         | 100, 300, 500, 1000, 5000 |
| Sum of low and high density residential land | HDLRES        | m <sup>2</sup>         | +         | 100, 300, 500, 1000, 5000 |
| Sum of URBGREEN & NATURAL                    | UGNL          | m <sup>2</sup>         | -         | 100, 300, 500, 1000, 5000 |
| <b>Other spatial predictors</b>              |               |                        |           |                           |
| Population data                              | POPEEA        | m <sup>2</sup>         | +         | 100, 300, 500, 1000, 5000 |
| Household density                            | HHOLD         | Number                 | +         | 100, 300, 500, 1000, 5000 |
| Traffic intensity on nearest road            | TRAFNEAR      | Veh. day <sup>-1</sup> | +         |                           |

|                                                                                                                              |                    |                                        |   |                           |
|------------------------------------------------------------------------------------------------------------------------------|--------------------|----------------------------------------|---|---------------------------|
| Inverse distance to nearest road                                                                                             | DISTINVNEAR1       | m <sup>-1</sup>                        | + |                           |
| Product of traffic intensity on nearest road and inverse distance to the nearest road                                        | INTINVDIST         | Veh. day <sup>-1</sup> m <sup>-1</sup> | + |                           |
| Traffic intensity on nearest major road                                                                                      | TRAFMAJOR          | Veh. day <sup>-1</sup>                 | + |                           |
| Inverse distance to nearest major road                                                                                       | DISTINVMAJOR1      | m <sup>-1</sup>                        | + |                           |
| Product of traffic intensity in nearest major road and inverse of distance to nearest major road                             | INTMAJORINVDIST    | Veh. day <sup>-1</sup> m <sup>-1</sup> | + |                           |
| Total traffic load of major roads in a buffer (sum of (traffic intensity*length of all segments))                            | TRAFMAJORLOAD      | Veh. day <sup>-1</sup> m               | + | 50, 100, 300, 500, 1000   |
| Traffic total load of roads in a buffer (sum of (traffic intensity * length of all segments))                                | TRAFLOAD           | Veh. day <sup>-1</sup> m               | + | 50, 100, 300, 500, 1000   |
| Heavy-duty traffic intensity om nearest road                                                                                 | HEAVYTRAFNEAR      | Veh. day <sup>-1</sup>                 | + |                           |
| Product of heavy-duty traffic intensity on nearest road and inverse distance to the nearest road                             | HEAVYINTINVDIST    | Veh. day <sup>-1</sup> m <sup>-1</sup> | + |                           |
| Heavy-duty traffic intensity om nearest major road                                                                           | HEAVYTRAFMAJOR     | Veh. day <sup>-1</sup>                 | + |                           |
| Total heavy-duty traffic load of all major roads in a buffer (sum of (heavy-duty traffic intensity * length of all segments) | HEAVYTRAFMAJORLOAD | Veh. day <sup>-1</sup> m               | + | 50, 100, 300, 500, 1000   |
| Total heavy-duty traffic load of all roads in a buffer (sum of (heavy-duty traffic intensity * length of all segments)       | HEAVYTRAFLOAD      | Veh. day <sup>-1</sup> m               | + | 50, 100, 300, 500, 1000   |
| Road length of all roads in a buffer                                                                                         | ROADLENGTH         | m                                      | + | 50, 100, 300, 500, 1000   |
| Road length of all major roads in a buffer                                                                                   | MAJORROADLENGTH    | m                                      | + | 50, 100, 300, 500, 1000   |
| Restaurants <sup>a) b)</sup>                                                                                                 | RESTAURANT         | Number                                 | + | 100, 300, 500, 1000, 5000 |
| Altitude above sea level                                                                                                     | SQRALT             | m                                      | - | Square root altitude      |
| Distance to major point source                                                                                               | DISTPOINT          | m                                      | - | If applicable to the area |

- a) Generated from the Overpass Turbo Web application, selecting amenities marked as "Restaurant", "Fast\_food", "Pub" or "Cafe" in OpenStreetMap. It is plausible that restaurant density is underreported in all areas, since owners should actively report their facility and pay a fee to be in the OpenStreetMap database. Local researchers evaluated plausibility of restaurant representation and decided on the use of this data.
- b) Data not collected for Heraklion, coverage of amenities was low and differential among neighborhoods

**Supplement 5: Local and combined Land Use Regression (LUR) models developed within the EXPOsOMICS study.**

- 10 local models / 10 combined models on pooled data were developed, each built on 90% of the site measurements (Model R2 is shown), and subsequently validated on the other 10% (Holdout Validation not shown).  
Model structures per model per area are presented below;
- A predictor was used when there was at least 10% representation over monitoring sites (90<sup>th</sup> percentile differed from 0).  
In addition for EU models, a predictor had to be represented in 3 or more (≥50%) of study areas;
- Predictor coefficients presented are multiplied by the spread in the specific predictor, calculated as the 90<sup>th</sup> – 10<sup>th</sup> percentile, expressing the proportional change in UFP for an increase between the 10<sup>th</sup> and 90<sup>th</sup> percentile of the predictor;
- Predictor categories are presented in the first column;  
(NT = Nearby Traffic, DT = Distant Traffic, PP = Population, IN = Industry, RE = Restaurants, PT = Port, AI = Airport, GR = Greenspace).

**Table S3;** Model structures per study area  
**A) Basel**

|                                                                                                                                                   | <b>PREDICTOR<br/>10<sup>th</sup> – 90<sup>th</sup><br/>percentile</b> | <b>UFP<br/>Model1</b> | <b>UFP<br/>Model2</b> | <b>UFP<br/>Model3</b> | <b>UFP<br/>Model4</b> | <b>UFP<br/>Model5</b> | <b>UFP<br/>Model6</b> | <b>UFP<br/>Model7</b> | <b>UFP<br/>Model8</b> | <b>UFP<br/>Model9</b> | <b>UFP<br/>Model10</b> |      |
|---------------------------------------------------------------------------------------------------------------------------------------------------|-----------------------------------------------------------------------|-----------------------|-----------------------|-----------------------|-----------------------|-----------------------|-----------------------|-----------------------|-----------------------|-----------------------|------------------------|------|
| Intercept                                                                                                                                         |                                                                       | 5332                  | 6589                  | 5784                  | 5697                  | 6013                  | 6635                  | 4922                  | 7014                  | 6487                  | 6381                   |      |
| NT                                                                                                                                                | Traffic intensity on nearest road                                     | <b>17038</b>          | 4306*                 | 6261                  | 6909                  | 5264                  | 6639                  | 7095                  | 5157                  | 6278                  | 4275                   | 6397 |
| NT                                                                                                                                                | Road length of all major roads in a buffer of 50m                     | <b>100</b>            | 1544                  |                       |                       | 1655                  |                       | 1373                  |                       | 1522                  |                        |      |
| PP                                                                                                                                                | Sum of low and high density residential land in a buffer of 500m      | <b>356207</b>         |                       |                       |                       |                       | 2548                  | 3017                  | 2029                  | 2050                  | 1817                   |      |
| PP                                                                                                                                                | Sum of low and high density residential land in a buffer of 1000m     | <b>1234324</b>        | 2775                  | 2149                  | 2380                  | 2398                  |                       | 2027                  |                       |                       |                        |      |
| RE                                                                                                                                                | Number of restaurants in a buffer of 100m                             | <b>2</b>              | 2570                  | 2761                  | 3026                  | 2404                  | 2769                  | 3416                  | 2008                  | 2808                  | 3078                   | 1400 |
| RE                                                                                                                                                | Number of restaurants in a buffer of 1000m                            | <b>97</b>             |                       |                       |                       |                       |                       |                       |                       |                       |                        | 2831 |
| <b>Model R<sup>2</sup></b>                                                                                                                        |                                                                       | <b>29.3%</b>          | <b>26.2%</b>          | <b>32.3%</b>          | <b>30.4%</b>          | <b>28.0%</b>          | <b>33.8%</b>          | <b>27.9%</b>          | <b>27.0%</b>          | <b>31.3%</b>          | <b>30.9%</b>           |      |
| NT = Nearby Traffic, PP = Population, RE = Restaurants                                                                                            |                                                                       |                       |                       |                       |                       |                       |                       |                       |                       |                       |                        |      |
| * All presented coefficients are Model coefficients multiplied by the value of the 10 <sup>th</sup> -90 <sup>th</sup> percentile of the predictor |                                                                       |                       |                       |                       |                       |                       |                       |                       |                       |                       |                        |      |

## B) Heraklion

|                                                                                                                                                   | PREDICTOR<br>10 <sup>th</sup> – 90 <sup>th</sup><br>percentile                        | UFP<br>Model1  | UFP<br>Model2 | UFP<br>Model3 | UFP<br>Model4 | UFP<br>Model5 | UFP<br>Model6 | UFP<br>Model7 | UFP<br>Model8 | UFP<br>Model9 | UFP<br>Model10 |      |
|---------------------------------------------------------------------------------------------------------------------------------------------------|---------------------------------------------------------------------------------------|----------------|---------------|---------------|---------------|---------------|---------------|---------------|---------------|---------------|----------------|------|
| Intercept                                                                                                                                         |                                                                                       | 4709           | 1493          | 3873          | 1065          | 6255          | 3258          | 2534          | 2821          | 1759          | 1701           |      |
| <i>NT</i>                                                                                                                                         | Traffic intensity on nearest road                                                     | <b>14154</b>   | 6830*         | 6851          | 8437          | 5770          | 6466          | 6429          | 2961          | 6163          | 6727           | 7154 |
| <i>NT</i>                                                                                                                                         | Road length of all roads in a buffer of 50m                                           | <b>234</b>     |               | 3851          |               |               |               | 2539          | 3958          | 3532          | 2710           |      |
| <i>NT</i>                                                                                                                                         | Product of traffic intensity on nearest road and inverse distance to the nearest road | <b>1630</b>    |               |               | 2756          |               |               | 6562          |               |               |                |      |
| <i>DT</i>                                                                                                                                         | Road length of all roads in a buffer of 500m                                          | <b>17125</b>   |               |               | 2872          |               |               |               |               |               |                |      |
| <i>PP</i>                                                                                                                                         | Population land use in a buffer of 100m                                               | <b>1292</b>    |               |               | 3417          |               | 2455          |               |               |               |                |      |
| <i>PP</i>                                                                                                                                         | Population land use in a buffer of 300m                                               | <b>11270</b>   | 3299          | 3342          | 3250          |               |               |               |               |               | 2329           |      |
| <i>IN</i>                                                                                                                                         | Industry within a buffer of 5000m                                                     | <b>3201922</b> | 4861          | 4665          | 4934          | 5306          |               | 6561          | 3407          | 4585          | 5222           |      |
| <i>AI</i>                                                                                                                                         | Airport within a buffer of 5000m                                                      | <b>2830488</b> |               |               |               |               | 3903          |               | 3575          |               |                |      |
| <i>PT</i>                                                                                                                                         | Port within a buffer of 1000m                                                         | <b>306569</b>  |               |               |               | 3173          |               | 3715          | 2788          |               |                |      |
| <i>GR</i>                                                                                                                                         | Urban green + semi-natural and forested areas within a buffer of 500m                 | <b>112393</b>  | -1938         |               |               | -2570         |               |               |               |               |                |      |
| <i>GR</i>                                                                                                                                         | Urban green + semi-natural and forested areas within a buffer of 1000m                | <b>379034</b>  |               | -2917         |               |               |               |               |               |               |                |      |
| <b>Model R<sup>2</sup></b>                                                                                                                        |                                                                                       | <b>32.6%</b>   | <b>38.9%</b>  | <b>35.0%</b>  | <b>40.8%</b>  | <b>33.3%</b>  | <b>33.7%</b>  | <b>44.9%</b>  | <b>35.2%</b>  | <b>34.7%</b>  | <b>35.8%</b>   |      |
| NT = Nearby Traffic, DT = Distant Traffic, PP = Population, IN = Industry, AI = Airport, PT = Port, GR = Greenspace                               |                                                                                       |                |               |               |               |               |               |               |               |               |                |      |
| * All presented coefficients are Model coefficients multiplied by the value of the 10 <sup>th</sup> -90 <sup>th</sup> percentile of the predictor |                                                                                       |                |               |               |               |               |               |               |               |               |                |      |



**C) The Netherlands**

|                                                                                                                                                   | <b>PREDICTOR<br/>10<sup>th</sup> – 90<sup>th</sup><br/>percentile</b>                                                         | <b>UFP<br/>Model1</b> | <b>UFP<br/>Model2</b> | <b>UFP<br/>Model3</b> | <b>UFP<br/>Model4</b> | <b>UFP<br/>Model5</b> | <b>UFP<br/>Model6</b> | <b>UFP<br/>Model7</b> | <b>UFP<br/>Model8</b> | <b>UFP<br/>Model9</b> | <b>UFP<br/>Model10</b> |
|---------------------------------------------------------------------------------------------------------------------------------------------------|-------------------------------------------------------------------------------------------------------------------------------|-----------------------|-----------------------|-----------------------|-----------------------|-----------------------|-----------------------|-----------------------|-----------------------|-----------------------|------------------------|
|                                                                                                                                                   | Intercept                                                                                                                     | 8045                  | 8315                  | 7828                  | 8568                  | 8355                  | 8333                  | 7938                  | 7663                  | 6800                  | 8314                   |
| <i>NT</i>                                                                                                                                         | Traffic intensity on nearest road                                                                                             | 2339*                 | 2408                  |                       | 4434                  | 3865                  |                       | 2277                  | 2650                  | 3389                  |                        |
| <i>NT</i>                                                                                                                                         | Heavy traffic intensity on nearest road                                                                                       |                       |                       | 1562                  |                       |                       | 1504                  |                       |                       |                       | 1825                   |
| <i>NT</i>                                                                                                                                         | Traffic total load of roads in a buffer of 50m (sum of(traffic intensity * length of all segments))                           | 3621                  | 3975                  | 3588                  |                       |                       | 3559                  | 3518                  | 3592                  |                       | 3001                   |
| <i>NT</i>                                                                                                                                         | Total heavy-duty traffic load of all roads in a buffer of 50m (sum of(heavy-duty traffic intensity * length of all segments)) |                       |                       |                       | 860                   |                       |                       |                       |                       |                       |                        |
| <i>NT</i>                                                                                                                                         | Road length of all major roads in a buffer of 50m                                                                             | 2571                  |                       | 3490                  | 2096                  | 4066                  | 2995                  | 3327                  |                       | 4183                  | 3382                   |
| <i>NT</i>                                                                                                                                         | Road length of all major roads in a buffer of 100m                                                                            |                       | 2336                  |                       |                       |                       |                       |                       | 2168                  |                       |                        |
| <i>DT</i>                                                                                                                                         | Traffic total load of roads in a buffer of 300m (sum of(traffic intensity * length of all segments))                          |                       |                       |                       | 2431                  | 3161                  |                       |                       |                       | 3091                  |                        |
| <i>PP</i>                                                                                                                                         | Household density in a buffer of 1000m                                                                                        | 4646                  |                       |                       |                       |                       | 3221                  | 4955                  |                       |                       |                        |
| <i>PP</i>                                                                                                                                         | Sum of low and high density residential land in a buffer of 5000m                                                             |                       |                       |                       |                       |                       |                       |                       |                       | 2780                  |                        |
| <i>PP</i>                                                                                                                                         | Population land use in a buffer of 5000m                                                                                      |                       | 2609                  | 3554                  |                       |                       |                       |                       | 4995                  |                       | 3721                   |
| <i>IN</i>                                                                                                                                         | Industry within a buffer of 300m                                                                                              |                       |                       |                       |                       |                       |                       |                       |                       |                       | 172                    |
| <i>IN</i>                                                                                                                                         | Industry within a buffer of 500m                                                                                              | 1405                  | 734                   | 775                   | 1100                  | 834                   | 1031                  |                       | 794                   |                       |                        |
| <i>PT</i>                                                                                                                                         | Port within a buffer of 5000m                                                                                                 |                       | 2413                  | 2404                  | 3296                  | 3101                  | 2404                  |                       |                       | 2319                  |                        |
| <b>Model R<sup>2</sup></b>                                                                                                                        |                                                                                                                               | <b>45.8%</b>          | <b>45.9%</b>          | <b>49.5%</b>          | <b>49.7%</b>          | <b>48.5%</b>          | <b>47.0%</b>          | <b>50.9%</b>          | <b>45.0%</b>          | <b>49.2%</b>          | <b>47.4%</b>           |
| NT = Nearby Traffic, DT = Distant Traffic, PP = Population, IN = Industry, PT = Port                                                              |                                                                                                                               |                       |                       |                       |                       |                       |                       |                       |                       |                       |                        |
| * All presented coefficients are Model coefficients multiplied by the value of the 10 <sup>th</sup> -90 <sup>th</sup> percentile of the predictor |                                                                                                                               |                       |                       |                       |                       |                       |                       |                       |                       |                       |                        |

**D) Norwich**

|                                                                                                                                                                                                                                              |                                                                                                     | <b>PREDICTOR<br/>10<sup>th</sup> – 90<sup>th</sup><br/>percentile</b> | <b>UFP<br/>Model1</b> | <b>UFP<br/>Model2</b> | <b>UFP<br/>Model3</b> | <b>UFP<br/>Model4</b> | <b>UFP<br/>Model5</b> | <b>UFP<br/>Model6</b> | <b>UFP<br/>Model7</b> | <b>UFP<br/>Model8</b> | <b>UFP<br/>Model9</b> | <b>UFP<br/>Model10</b> |
|----------------------------------------------------------------------------------------------------------------------------------------------------------------------------------------------------------------------------------------------|-----------------------------------------------------------------------------------------------------|-----------------------------------------------------------------------|-----------------------|-----------------------|-----------------------|-----------------------|-----------------------|-----------------------|-----------------------|-----------------------|-----------------------|------------------------|
|                                                                                                                                                                                                                                              | Intercept                                                                                           |                                                                       | 2350                  | 2523                  | 217                   | 3017                  | 2547                  | 2603                  | 2795                  | 1495                  | 2192                  | 2501                   |
| <i>NT</i>                                                                                                                                                                                                                                    | Traffic intensity on nearest road                                                                   | <b>14483</b>                                                          | 7155*                 | 4482                  | 6766                  | 5115                  | 4931                  | 4171                  | 4873                  |                       | 2911                  | 5367                   |
| <i>NT</i>                                                                                                                                                                                                                                    | Traffic total load of roads in a buffer of 50m (sum of(traffic intensity * length of all segments)) | <b>1904994</b>                                                        |                       | 2875                  |                       | 2720                  |                       | 3174                  | 2673                  | 3757                  |                       |                        |
| <i>NT</i>                                                                                                                                                                                                                                    | Road length of all roads in a buffer of 50m                                                         | <b>155</b>                                                            |                       |                       | 2361                  |                       |                       |                       |                       |                       |                       |                        |
| <i>NT</i>                                                                                                                                                                                                                                    | Road length of all major roads in a buffer of 50m                                                   | <b>99</b>                                                             |                       |                       |                       |                       | 1903                  |                       |                       |                       |                       | 1950                   |
| <i>NT</i>                                                                                                                                                                                                                                    | Product of traffic intensity on nearest road and inverse distance to the nearest road               | <b>2224</b>                                                           |                       |                       |                       |                       |                       |                       |                       | 2637                  | 3194                  |                        |
| <i>PP</i>                                                                                                                                                                                                                                    | Population land use in a buffer of 5000m                                                            | <b>90942</b>                                                          | 2893                  | 2604                  | 3184                  | 2273                  | 3394                  | 2290                  | 2343                  | 3861                  | 3444                  | 3440                   |
| <i>IN</i>                                                                                                                                                                                                                                    | Industry within a buffer of 500m                                                                    | <b>154676</b>                                                         |                       |                       |                       | 3544                  |                       |                       |                       |                       |                       | 2582                   |
| <i>IN</i>                                                                                                                                                                                                                                    | Industry within a buffer of 1000m                                                                   | <b>501510</b>                                                         | 2912                  | 3019                  | 3278                  |                       | 2373                  | 3765                  | 3360                  | 3443                  | 3786                  |                        |
| <i>AI</i>                                                                                                                                                                                                                                    | Airport within a buffer of 5000m                                                                    | <b>2388905</b>                                                        | 1978                  | 2009                  |                       | 1818                  |                       | 2260                  | 2007                  |                       |                       |                        |
| <b>Model R<sup>2</sup></b>                                                                                                                                                                                                                   |                                                                                                     |                                                                       | <b>43.1%</b>          | <b>38.7%</b>          | <b>39.9%</b>          | <b>40.6%</b>          | <b>35.9%</b>          | <b>42.6%</b>          | <b>37.4%</b>          | <b>37.1%</b>          | <b>37.6%</b>          | <b>39.9%</b>           |
| NT = Nearby Traffic, DT = Distant Traffic, PP = Population, IN = Industry, AI = Airport<br>* All presented coefficients are Model coefficients multiplied by the value of the 10 <sup>th</sup> -90 <sup>th</sup> percentile of the predictor |                                                                                                     |                                                                       |                       |                       |                       |                       |                       |                       |                       |                       |                       |                        |

**E) Sabadell**

|                                                                                                                                                                                                                                 | <b>PREDICTOR<br/>10<sup>th</sup> – 90<sup>th</sup><br/>percentile</b> | <b>UFP<br/>Model1</b> | <b>UFP<br/>Model2</b> | <b>UFP<br/>Model3</b> | <b>UFP<br/>Model4</b> | <b>UFP<br/>Model5</b> | <b>UFP<br/>Model6</b> | <b>UFP<br/>Model7</b> | <b>UFP<br/>Model8</b> | <b>UFP<br/>Model9</b> | <b>UFP<br/>Model10</b> |      |
|---------------------------------------------------------------------------------------------------------------------------------------------------------------------------------------------------------------------------------|-----------------------------------------------------------------------|-----------------------|-----------------------|-----------------------|-----------------------|-----------------------|-----------------------|-----------------------|-----------------------|-----------------------|------------------------|------|
|                                                                                                                                                                                                                                 | Intercept                                                             | 9036                  | 9194                  | 9142                  | 9321                  | 9874                  | 9982                  | 9189                  | 9222                  | 5524                  | 9284                   |      |
| <i>NT</i>                                                                                                                                                                                                                       | Traffic intensity on nearest road                                     | <b>5225*</b>          | 6208                  | 5936                  | 5212                  | 6869                  | 6056                  | 5823                  | 5894                  | 4610                  | 6613                   |      |
| <i>DT</i>                                                                                                                                                                                                                       | Road length of all major roads in a buffer of 1000m                   | <b>7724</b>           |                       |                       |                       |                       |                       |                       |                       | 3395                  |                        |      |
| <i>IN</i>                                                                                                                                                                                                                       | Industry within a buffer of 300m                                      | <b>12517</b>          | 386                   | 353                   | 368                   | 404                   | 328                   | 301                   | 435                   | 362                   | 438                    |      |
| <i>IN</i>                                                                                                                                                                                                                       | Industry within a buffer of 5000m                                     | <b>6563930</b>        |                       |                       |                       |                       |                       |                       |                       |                       | 2678                   |      |
| <i>RE</i>                                                                                                                                                                                                                       | Number of restaurants in a buffer of 100m                             | <b>5</b>              |                       |                       | 2244                  |                       |                       |                       |                       |                       | 3310                   |      |
| <i>RE</i>                                                                                                                                                                                                                       | Number of restaurants in a buffer of 1000m                            | <b>182</b>            | 8417                  | 7719                  | 7774                  | 7216                  | 6374                  | 6391                  | 7658                  | 7920                  | 5274                   | 7501 |
| <b>Model R<sup>2</sup></b>                                                                                                                                                                                                      |                                                                       | <b>25.5%</b>          | <b>27.4%</b>          | <b>26.9%</b>          | <b>29.4%</b>          | <b>30.1%</b>          | <b>30.6%</b>          | <b>27.7%</b>          | <b>27.3%</b>          | <b>30.2%</b>          | <b>27.6%</b>           |      |
| NT = Nearby Traffic, DT = Distant Traffic, IN = Industry, RE = Restaurants<br>* All presented coefficients are Model coefficients multiplied by the value of the 10 <sup>th</sup> -90 <sup>th</sup> percentile of the predictor |                                                                       |                       |                       |                       |                       |                       |                       |                       |                       |                       |                        |      |

**F) Turin**

|                                                                                                                                                                                                                           | <b>PREDICTOR<br/>10<sup>th</sup> – 90<sup>th</sup><br/>percentile</b> | <b>UFP<br/>Model1</b> | <b>UFP<br/>Model2</b> | <b>UFP<br/>Model3</b> | <b>UFP<br/>Model4</b> | <b>UFP<br/>Model5</b> | <b>UFP<br/>Model6</b> | <b>UFP<br/>Model7</b> | <b>UFP<br/>Model8</b> | <b>UFP<br/>Model9</b> | <b>UFP<br/>Model10</b> |
|---------------------------------------------------------------------------------------------------------------------------------------------------------------------------------------------------------------------------|-----------------------------------------------------------------------|-----------------------|-----------------------|-----------------------|-----------------------|-----------------------|-----------------------|-----------------------|-----------------------|-----------------------|------------------------|
| Intercept                                                                                                                                                                                                                 |                                                                       | 6413                  | 7126                  | 6740                  | 8764                  | 8812                  | 7691                  | 7014                  | 7467                  | 8518                  | 6860                   |
| <i>NT</i> Traffic total load of roads in a buffer of 50m (sum of(traffic intensity * length of all segments))                                                                                                             | <b>3368797</b>                                                        | 8840*                 | 8304                  | 5912                  | 8712                  | 9035                  | 8937                  | 8557                  | 8264                  | 9038                  | 8190                   |
| <i>NT</i> Road length of all major roads in a buffer of 50m                                                                                                                                                               | <b>100</b>                                                            |                       |                       | 2427                  |                       |                       |                       |                       |                       |                       |                        |
| <i>PP</i> Sum of low and high density residential land in a buffer of 100m                                                                                                                                                | <b>12848</b>                                                          | 2642                  | 2386                  | 2324                  | 1961                  | 1711                  | 2144                  | 2390                  | 2212                  | 1854                  | 2460                   |
| <i>IN</i> Industry within a buffer of 1000m                                                                                                                                                                               | <b>461740</b>                                                         | 1284                  | 1231                  | 1092                  |                       |                       |                       | 1085                  | 1198                  |                       | 1413                   |
| <i>GR</i> Urban green within a buffer of 1000m                                                                                                                                                                            | <b>391625</b>                                                         |                       |                       |                       | -1717                 |                       |                       |                       |                       |                       |                        |
| <b>Model R<sup>2</sup></b>                                                                                                                                                                                                |                                                                       | <b>41.3%</b>          | <b>38.3%</b>          | <b>41.9%</b>          | <b>41.1%</b>          | <b>41.7%</b>          | <b>37.9%</b>          | <b>42.8%</b>          | <b>39.5%</b>          | <b>39.9%</b>          | <b>39.0%</b>           |
| NT = Nearby Traffic, PP = Population, IN = Industry, GR = Greenspace<br>* All presented coefficients are Model coefficients multiplied by the value of the 10 <sup>th</sup> -90 <sup>th</sup> percentile of the predictor |                                                                       |                       |                       |                       |                       |                       |                       |                       |                       |                       |                        |

**Table S4;** Model structures of combines area models  
**COMBINED AREA MODEL**

|                                                                                                                                                   | <b>PREDICTOR<br/>10<sup>th</sup> – 90<sup>th</sup><br/>percentile</b>                                          | <b>UFP<br/>Model1</b> | <b>UFP<br/>Model2</b> | <b>UFP<br/>Model3</b> | <b>UFP<br/>Model4</b> | <b>UFP<br/>Model5</b> | <b>UFP<br/>Model6</b> | <b>UFP<br/>Model7</b> | <b>UFP<br/>Model8</b> | <b>UFP<br/>Model9</b> | <b>UFP<br/>Model10</b> |      |
|---------------------------------------------------------------------------------------------------------------------------------------------------|----------------------------------------------------------------------------------------------------------------|-----------------------|-----------------------|-----------------------|-----------------------|-----------------------|-----------------------|-----------------------|-----------------------|-----------------------|------------------------|------|
|                                                                                                                                                   | Intercept                                                                                                      | 6584                  | 6450                  | 6650                  | 7134                  | 5780                  | 7268                  | 6840                  | 6815                  | 6597                  | 6602                   |      |
| <i>NT</i>                                                                                                                                         | Traffic intensity on nearest road                                                                              | <b>21097</b>          | 4883*                 | 5289                  | 5002                  | 4685                  | 5173                  | 4504                  | 5062                  | 5133                  | 4421                   | 5183 |
| <i>NT</i>                                                                                                                                         | Road length of all roads in a<br>buffer of 50m                                                                 | <b>215</b>            |                       |                       |                       | 1085                  |                       |                       |                       |                       |                        |      |
| <i>NT</i>                                                                                                                                         | Road length of all major roads in<br>a buffer of 100m                                                          | <b>266</b>            | 2160                  | 1632                  | 1734                  | 2246                  | 1496                  | 2139                  | 1759                  | 1875                  | 2036                   | 1861 |
| <i>DT</i>                                                                                                                                         | Traffic total load of roads in a<br>buffer of 1000m (sum of(traffic<br>intensity * length of all<br>segments)) | <b>465493528</b>      | 1396                  | 1862                  | 1396                  | 931                   | 1396                  | 1396                  | 1396                  | 1396                  | 1396                   | 1396 |
| <i>PP</i>                                                                                                                                         | Sum of low and high density<br>residential land in a buffer of<br>1000m                                        | <b>1989948</b>        | 925                   |                       |                       |                       |                       | 1361                  |                       | 1165                  |                        |      |
| <i>PP</i>                                                                                                                                         | Sum of low and high density<br>residential land in a buffer of<br>5000m                                        | <b>32357316</b>       | 1860                  | 2403                  | 2259                  | 1597                  | 2685                  | 1796                  | 1389                  | 2240                  | 1449                   | 2354 |
| <i>PP</i>                                                                                                                                         | Population land use in a buffer of<br>300m                                                                     | <b>5512</b>           |                       |                       |                       | 2683                  |                       | 2773                  |                       |                       |                        |      |
| <i>PP</i>                                                                                                                                         | Population land use in a buffer of<br>1000m                                                                    | <b>45496</b>          |                       |                       |                       |                       |                       |                       | 1689                  |                       |                        |      |
| <i>PP</i>                                                                                                                                         | Population land use in a buffer of<br>5000m                                                                    | <b>448077</b>         | 2039                  | 1812                  | 2589                  |                       | 1941                  |                       | 2103                  |                       | 2168                   | 2233 |
| <i>IN</i>                                                                                                                                         | Industry within a buffer of<br>5000m                                                                           | <b>7101377</b>        | 959                   | 1321                  | 831                   | 1349                  | 1129                  | 1023                  | 824                   | 1122                  | 1058                   | 1150 |
| <b>Model R<sup>2</sup>‡</b>                                                                                                                       |                                                                                                                | <b>34.6%</b>          | <b>34.1%</b>          | <b>32.8%</b>          | <b>34.8%</b>          | <b>35.3%</b>          | <b>32.6%</b>          | <b>33.9%</b>          | <b>33.1%</b>          | <b>32.1%</b>          | <b>33.6%</b>           |      |
| <b>Random area effects:</b>                                                                                                                       |                                                                                                                |                       |                       |                       |                       |                       |                       |                       |                       |                       |                        |      |
|                                                                                                                                                   | Basel                                                                                                          | -247                  | 50                    | -132                  | 212                   | -38                   | 164                   | -7                    | 218                   | -52                   | -160                   |      |
|                                                                                                                                                   | Heraklion                                                                                                      | -362                  | -320                  | -284                  | -879                  | -303                  | -810                  | -270                  | -653                  | -329                  | -280                   |      |
|                                                                                                                                                   | The Netherlands                                                                                                | 414                   | 402                   | 433                   | 566                   | 362                   | 366                   | 403                   | 220                   | 285                   | 259                    |      |
|                                                                                                                                                   | Norwich                                                                                                        | -763                  | -654                  | -1066                 | -437                  | -667                  | -338                  | -987                  | -978                  | -1095                 | -856                   |      |
|                                                                                                                                                   | Sabadell                                                                                                       | 1510                  | 1079                  | 2033                  | 1338                  | 1278                  | 1601                  | 1471                  | 1130                  | 1651                  | 1461                   |      |
|                                                                                                                                                   | Turin                                                                                                          | -552                  | -557                  | -984                  | -799                  | -632                  | -983                  | -610                  | 63                    | -460                  | -424                   |      |
| NT = Nearby Traffic, DT = Distant Traffic, PP = Population, IN = Industry                                                                         |                                                                                                                |                       |                       |                       |                       |                       |                       |                       |                       |                       |                        |      |
| * All presented coefficients are Model coefficients multiplied by the value of the 10 <sup>th</sup> -90 <sup>th</sup> percentile of the predictor |                                                                                                                |                       |                       |                       |                       |                       |                       |                       |                       |                       |                        |      |
| ‡ Model R <sup>2</sup> based development and HV in linear regression, prior to introduction of random intercept                                   |                                                                                                                |                       |                       |                       |                       |                       |                       |                       |                       |                       |                        |      |

## Supplement 6; Robustness analysis of predicted UFP concentrations

A 10-fold Holdout Validation (HV) approach was applied at model development, reducing potential model sensitivity to a single predictor in local/combined models. This approach allowed variation between models per area, aiming to generate more precise exposure predictions in epidemiological studies. 10 unique local/combined models were built that differed in intercept, predictors and/or coefficients. Consistency in UFP predictions was analyzed to assess model robustness.

### 1) Robustness of Local models

Model robustness of Local models was tested on external sites from each study area. These were home address locations visited in a Personal Exposure Monitoring campaign (Basel N=48, Heraklion N=50, the Netherlands N=42, Norwich N=31, Sabadell N=42, Turin N=44), also performed within the framework of EXPOsOMICS. Tables below show both a plot and a Pearson correlation coefficient for predicted UFP concentrations from all models per area tested against each other.

**Figure S5;** Correlation matrix and Pearson Correlation Coefficients of predicted UFP levels over 10 models per area

#### A) Basel

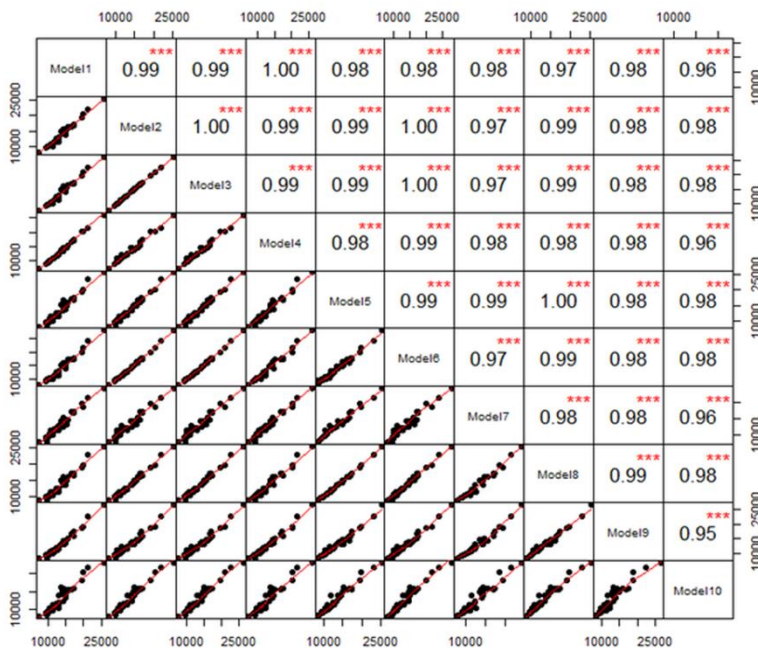

Red lines represent the best fit lines; \*\*\* = p-value < 0.001

B) Heraklion

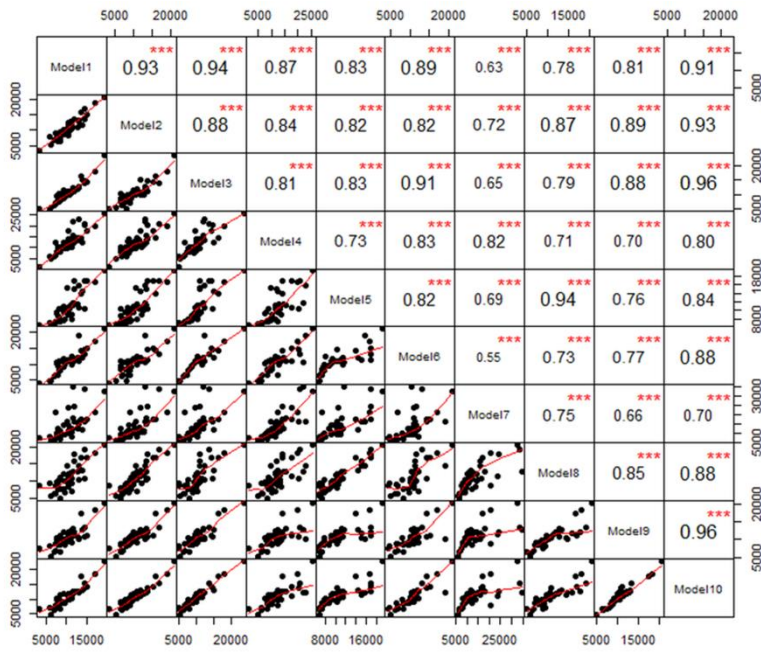

Red lines represent the best fit lines; \*\*\* = p-value < 0.001

C) The Netherlands

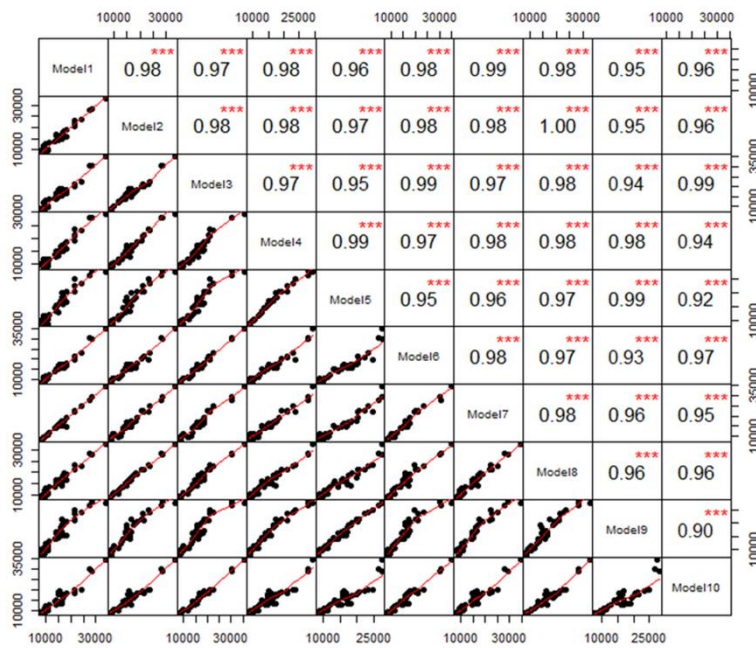

Red lines represent the best fit lines; \*\*\* = p-value < 0.001

D) Norwich

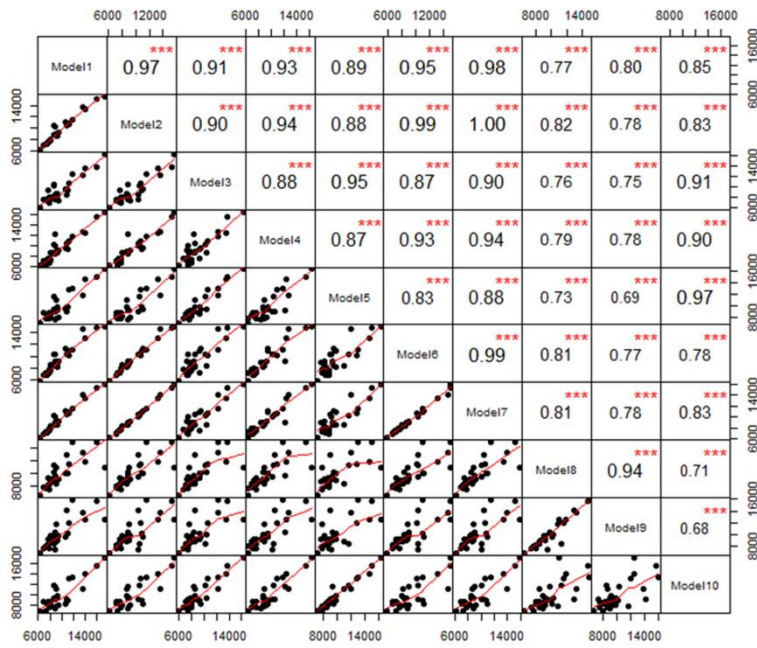

Red lines represent the best fit lines; \*\*\* = p-value < 0.001

E) Sabadell

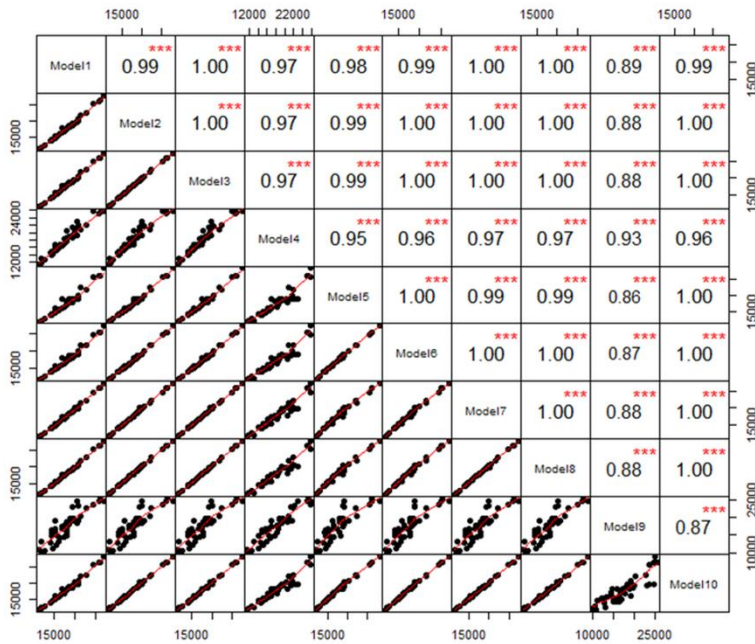

Red lines represent the best fit lines; \*\*\* = p-value < 0.001



F) Turin

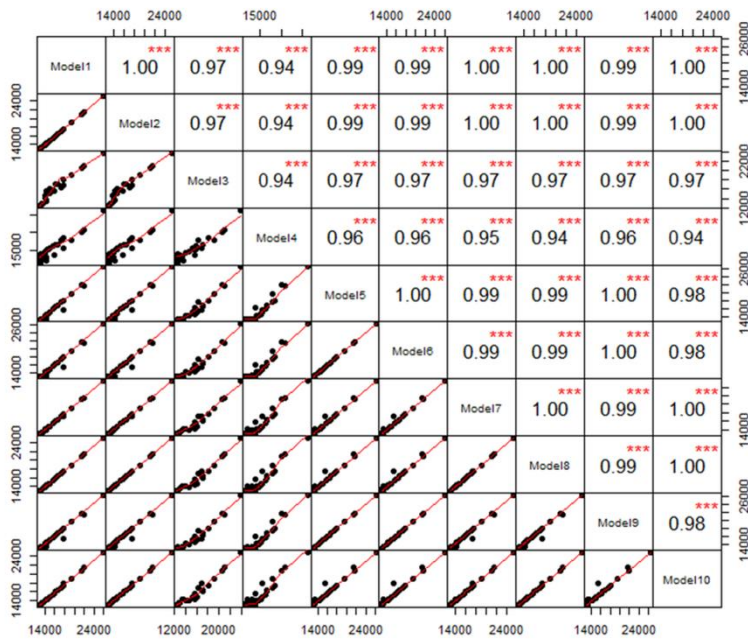

Red lines represent the best fit lines; \*\*\* = p-value < 0.001

## 2. Robustness of Combined area Models

Model robustness of Combined area models was tested on the same external sites, now pooled over all study areas (N=257). Again, a plot and a Pearson correlation coefficient are presented for predicted UFP concentrations from all models tested against each other.

**Figure S6;** Correlation matrix and Pearson Correlation Coefficients of predicted UFP levels over the 10 Combined area models

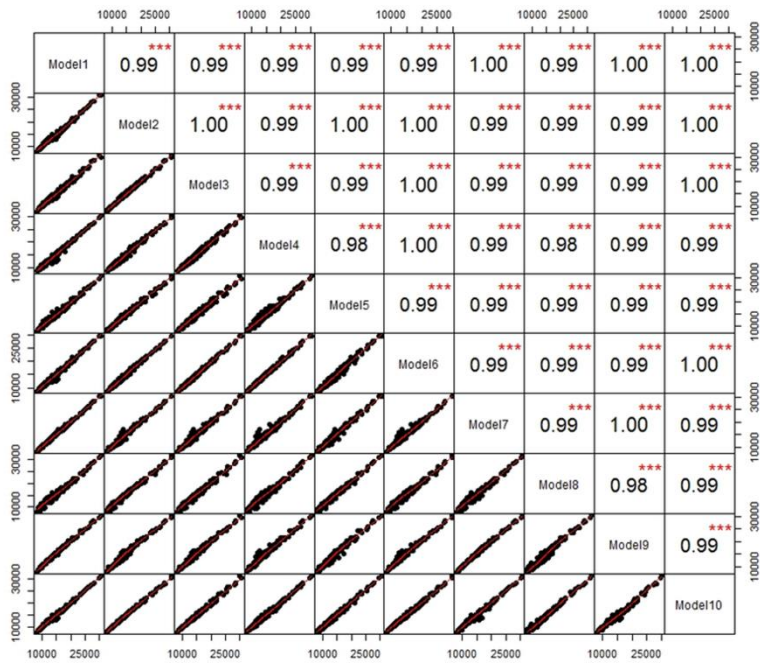

Red lines represent the best fit lines; \*\*\* = p-value < 0.001

## Supplement 7; Full area models, built upon 100% of the short-term monitoring sites

- Full area models per area and on pooled data were developed on all short-term monitoring sites. Model structures per area are presented below;
- A predictor was used when there was at least 10% representation over monitoring sites (90<sup>th</sup> percentile differed from 0). In addition for EU models, a predictor had to be represented in 3 or more ( $\geq 50\%$ ) of study areas;
- Predictor coefficients presented are multiplied by the spread in the specific predictor, calculated as the 90<sup>th</sup> – 10<sup>th</sup> percentile, expressing the proportional change in UFP for an increase between the 10<sup>th</sup> and 90<sup>th</sup> percentile of the predictor;
- Predictor categories are presented in the first column;  
(NT = Nearby Traffic, DT = Distant Traffic, PP = Population, IN = Industry, RE = Restaurants, AI = Airport).

**Table S5;** Model structures of models based on 100% of the sites per area

| <b>FULL AREA model</b><br>Based on 100% of the short-term sites per area |                                                                                                       | <b>UFP (90th-10th percentile)</b><br><b>BASEL</b> | <b>UFP (90th-10th percentile)</b><br><b>HERAKLION</b> | <b>UFP (90th-10th percentile)</b><br><b>NETHERLANDS</b> | <b>UFP (90th-10th percentile)</b><br><b>NORWICH</b> | <b>UFP (90th-10th percentile)</b><br><b>SABADELL</b> | <b>UFP (90th-10th percentile)</b><br><b>TURIN</b> | <b>UFP (90th-10th percentile)</b><br><b>COMBINED AREA*</b> |
|--------------------------------------------------------------------------|-------------------------------------------------------------------------------------------------------|---------------------------------------------------|-------------------------------------------------------|---------------------------------------------------------|-----------------------------------------------------|------------------------------------------------------|---------------------------------------------------|------------------------------------------------------------|
|                                                                          | Intercept                                                                                             | <b>6561</b>                                       | <b>3714</b>                                           | <b>7785</b>                                             | <b>2587</b>                                         | <b>9304</b>                                          | <b>7083</b>                                       | <b>6598</b>                                                |
| NT                                                                       | Traffic intensity on nearest road                                                                     | <b>6432*</b> (17038)                              | <b>4993</b> (14154)                                   | <b>2499</b> (14909)                                     | <b>4488</b> (14483)                                 | <b>5922</b> (33758)                                  |                                                   | <b>4931</b> (21097)                                        |
| NT                                                                       | Traffic total load of roads in a buffer of 50m (sum of(traffic intensity * length of all segments))   |                                                   |                                                       | <b>3456</b> (2.197e6)                                   | <b>2881</b> (1.905e6)                               |                                                      | <b>8585</b> (3.369e6)                             |                                                            |
| NT                                                                       | Road length of all major roads in a buffer of 50m                                                     |                                                   |                                                       | <b>2874</b> (174.3)                                     |                                                     |                                                      |                                                   |                                                            |
| NT                                                                       | Road length of all major roads in a buffer of 100m                                                    |                                                   |                                                       |                                                         |                                                     |                                                      |                                                   | <b>1923</b> (266)                                          |
| NT                                                                       | Product of traffic intensity on nearest road and inverse distance to the nearest road                 |                                                   | <b>3284</b> (1802)                                    |                                                         |                                                     |                                                      |                                                   |                                                            |
| DT                                                                       | Traffic total load of roads in a buffer of 1000m (sum of(traffic intensity * length of all segments)) |                                                   |                                                       |                                                         |                                                     |                                                      |                                                   | <b>1419</b> (4.655e8)                                      |
| PP                                                                       | Population land use in a buffer of 300m                                                               |                                                   | <b>2919</b> (11270)                                   |                                                         |                                                     |                                                      |                                                   | <b>908</b> (5512)                                          |
| PP                                                                       | Population land use in a buffer of 1000m                                                              |                                                   |                                                       |                                                         |                                                     |                                                      |                                                   | <b>1606</b> (45496)                                        |
| PP                                                                       | Population land use in a buffer of 5000m                                                              |                                                   |                                                       | <b>4710</b> (459495)                                    | <b>2574</b> (90942)                                 |                                                      |                                                   |                                                            |
| PP                                                                       | Sum of low and high density residential land in a buffer of 100m                                      |                                                   |                                                       |                                                         |                                                     |                                                      | <b>2361</b> (12848)                               |                                                            |

|                                                                                                                                                                                                                                                                                                                                                                                         |                                                                   |                          |                          |                     |                      |                          |                      |                          |
|-----------------------------------------------------------------------------------------------------------------------------------------------------------------------------------------------------------------------------------------------------------------------------------------------------------------------------------------------------------------------------------------|-------------------------------------------------------------------|--------------------------|--------------------------|---------------------|----------------------|--------------------------|----------------------|--------------------------|
| PP                                                                                                                                                                                                                                                                                                                                                                                      | Sum of low and high density residential land in a buffer of 1000m | <b>2106</b><br>(1.234e6) |                          |                     |                      |                          |                      |                          |
| PP                                                                                                                                                                                                                                                                                                                                                                                      | Sum of low and high density residential land in a buffer of 5000m |                          |                          |                     |                      |                          |                      | <b>2228</b><br>(3.236e7) |
| IN                                                                                                                                                                                                                                                                                                                                                                                      | Industry within a buffer of 300m                                  |                          |                          |                     |                      | <b>361</b> (12517)       |                      |                          |
| IN                                                                                                                                                                                                                                                                                                                                                                                      | Industry within a buffer of 500m                                  |                          |                          | <b>841</b> (108639) |                      |                          |                      |                          |
| IN                                                                                                                                                                                                                                                                                                                                                                                      | Industry within a buffer of 1000m                                 |                          |                          |                     | <b>3147</b> (501510) |                          | <b>1121</b> (461740) |                          |
| IN                                                                                                                                                                                                                                                                                                                                                                                      | Industry within a buffer of 5000m                                 |                          | <b>5365</b><br>(3.202e6) |                     |                      |                          |                      | <b>1010</b><br>(7.101e7) |
| RE                                                                                                                                                                                                                                                                                                                                                                                      | Number of restaurants in a buffer of 100m                         | <b>2678</b> (2)          |                          |                     |                      |                          |                      |                          |
| RE                                                                                                                                                                                                                                                                                                                                                                                      | Number of restaurants in a buffer of 1000m                        |                          |                          |                     |                      | <b>7702</b> (182.3)      |                      |                          |
| AI                                                                                                                                                                                                                                                                                                                                                                                      | Airport within a buffer of 5000m                                  |                          |                          |                     |                      | <b>1682</b><br>(2.389e6) |                      |                          |
| <b>Model R<sup>2</sup> ‡</b>                                                                                                                                                                                                                                                                                                                                                            |                                                                   | <b>28.3%</b>             | <b>35.4%</b>             | <b>46.9%</b>        | <b>39.1%</b>         | <b>27.2%</b>             | <b>39.1%</b>         | <b>33.7%‡</b>            |
| <p>The combined area model has a random intercept per area:</p> <ul style="list-style-type: none"> <li>-174 Basel</li> <li>-260 Heraklion</li> <li>+350 the Netherlands</li> <li>-965 Norwich</li> <li>+1653 Sabadell</li> <li>-604 Turin</li> </ul>                                                                                                                                    |                                                                   |                          |                          |                     |                      |                          |                      |                          |
| <p>NT = Nearby Traffic, DT = Distant Traffic, PP = Population, IN = Industry, AI = Airport, RE = Restaurant<br/> * All presented coefficients are Model coefficients multiplied by the value of the 10<sup>th</sup>-90<sup>th</sup> percentile of the predictor<br/> ‡ Model R<sup>2</sup> based development and HV in linear regression, prior to introduction of random intercept</p> |                                                                   |                          |                          |                     |                      |                          |                      |                          |

## Supplement 8; Linear Mixed-Effect Models on Combined area LUR models

LUR models for Ultrafine Particles (UFP) were developed at a large scale using adjusted average UFP concentrations at 1043 monitoring sites from six study areas combined, based on two or three reference site corrected 30 minute observations from different seasons, sampled according a standardized protocol. In model building, a Linear Regression model was developed, selecting predictors in a supervised stepwise selection procedure. The final Linear Regression models on combined data was analyzed for differences in background UFP between study areas, evaluating the introduction of a random intercept per study area in a Linear Mixed-Effect (LME) model. Furthermore, differences in predictor effects (due to e.g. traffic fleet compositions, housing characteristics or typical industrial influences) were evaluated per area, evaluating application of a random slope for predictors in the model.

Models were evaluated for model fit on all monitoring sites, as well as model performance on 83 independent home outdoor locations in Netherlands (N=42) and Basel (N=41), where repeated reference site corrected 24h outdoor measurements were available.

### 1) Introduction of Random Intercepts:

First, a single Linear Regression model was developed on all monitoring sites, and next difference in background UFP levels between study areas was evaluated in a LME model with a random intercept by area. This was performed by using predictors from the Linear Regression model and recalculating coefficients and significance levels, resulting in considerable changes in coefficients for INDUSTRY\_5000 (-45%), TRAFLOAD\_1000 (-31%) and HDLDRES\_5000 (+49%). Significance levels did not exceed 0.10 after LME application, not leading to exclusion of predictors from LME model (see Table1).

**Table S6;** Predictor coefficients and significance levels in the regular Linear Regression model and the Linear Mixed-Effect Model with Random Intercept by area.

#### Regular linear regression model

|             | Intercept    | TRAFNEAR   | POPEEA_1000 | INDUSTRY_5000 | MAJORROADLENGTH_100 | TRAFLOAD_1000 |
|-------------|--------------|------------|-------------|---------------|---------------------|---------------|
| Coefficient | 6281         | 0.231      | 0.035       | 2.622e-04     | 7.185               | 4.393e-06     |
| P-value     | 1.879e-25    | 1.833e-29  | 0.031       | 3.859e-04     | 4.428e-06           | 1.882e-06     |
|             | HDLDRES_5000 | POPEEA_300 |             |               |                     |               |
| Coefficient | 4.608e-05    | 0.186      |             |               |                     |               |
| P-value     | 6.148e-03    | 0.063      |             |               |                     |               |

**Linear Mixed-Effect Model**, introducing Random Intercept by area.

fixed effects

|             | Intercept | TRAFNEAR  | POPEEA_1000 | INDUSTRY_5000 | MAJORROADLENGTH_100 | TRAFLOAD_1000 |
|-------------|-----------|-----------|-------------|---------------|---------------------|---------------|
| Coefficient | 6598      | 0.234     | 0.035       | 1.422e-04     | 7.221               | 3.049e-06     |
| Pr (>Chisq) |           | 3.285e-31 | 0.040       | 0.091         | 4.329e-06           | 3.615e-03     |

|             | HDLDRES_5000 | POPEEA_300 |
|-------------|--------------|------------|
| Coefficient | 6.886e-05    | 0.165      |
| Pr (>Chisq) | 5.308e-03    | 0.097      |

random effects by AREA

|     |           |
|-----|-----------|
| BAS | -173.9112 |
| HER | -259.9689 |
| NL  | 350.1003  |
| NOR | -965.3472 |
| SAB | 1653.2410 |
| TOR | -604.1141 |

When applying both models on independent sites, the Linear Regression model explained UFP variability ( $R^2$ ) of 55.6% in NL, 49.6% in Basel, and 52.3% over pooled areas. The LME model with a random intercept predicted UFP variation of 56.4% in NL, 51.3% in Basel and 53.8% over pooled sets in UFP variation (Summary in Table 3). Based on these findings, LME is preferred over Linear Regression, since model performance increases when difference in background UFP levels by area are taken into account.

## 2) Evaluating Random Intercepts versus Random Intercepts and Random Slopes:

On top of previous findings, differences in predictor effects per area might add precision in UFP predictions per area. For this reason, alternately random slope for a single predictor was added to the LME model (Figures S1-S7 at the end of this document) and model fit on test sites was analyzed against the normal LME using an ANOVA.

**Table S7;** Analysis of model fit for the Linear Mixed-Effect Model with Random Intercept only against this model with an added random slope for 1 predictor.

|                                         | DF | AIC  | BIC  | LogLik | deviance | Chisq | Chi DF | Pr(>Chisq) |   |
|-----------------------------------------|----|------|------|--------|----------|-------|--------|------------|---|
| Random Intercept only                   | 10 | 2515 | 2564 | -1247  | 2495     |       |        |            |   |
| Random Intercept +<br>random slope for: |    |      |      |        |          |       |        |            |   |
| TRAFNEAR                                | 12 | 2503 | 2562 | -1239  | 2479     | 15.9  | 2      | 0.00034    | * |
| POPEEA_5000                             | 12 | 2513 | 2572 | -1244  | 2489     | 5.8   | 2      | 0.055      | . |
| INDUSTRY_5000                           | 12 | 2506 | 2565 | -1241  | 2482     | 13.2  | 2      | 0.0014     | * |
| MAJORROADLENGTH_100                     | 12 | 2512 | 2571 | -1244  | 2488     | 6.57  | 2      | 0.037      | * |
| TRAFLOAD_1000                           | 12 | 2518 | 2577 | -1247  | 2494     | 0.61  | 2      | 0.74       |   |
| HDLDRES_5000                            | 12 | 2520 | 2579 | -1248  | 2496     | 0     | 2      | 1          |   |
| POPEEA_300                              | 12 | 2519 | 2578 | -1247  | 2495     | 0.27  | 2      | 0.87       |   |

\*=significance <0.05; .=significance <0.10

Table 2 shows that model fit was significant different on test sites when a random slope for TRAFNEAR, INDUSTRY\_5000 or MAJORROADLENGTH\_100 was added to the LME model. For POPEEA\_5000, model fit increase was not significant.

When testing models described above,  $R^2$  for measured against modeled UFP concentrations was determined in NL, Basel, and on pooled data. As presented in Table 3; model performance in external sites did not increase when models also had a random slope, next to a random intercepts. For slopes that gave a significantly better model fit in the test sites, performance in the external sites decreased 0.5% at random TRAFNEAR and 2.7% at random MAJORROADLENGTH\_100. A drastic decrease in  $R^2$  was observed when random INDUSTRY\_5000 slopes was used.

Other predictors did not show a better model fit in test data when applying a random slope; performance on external sites only increased 0.3% when a random slope for POPEEA\_300 was applied.

**TableS8;** Model performance ( $R^2$ ) for measured against modeled UFP levels at external sites from the Netherlands (NL, N=42), Basel (N=41) and in both areas pooled

|                                         | <b>R<sup>2</sup> (%)<br/>Sites NL</b> | <b>R<sup>2</sup>(%)<br/>Sites Basel</b> | <b>R<sup>2</sup>(%)<br/>POOLED</b> |
|-----------------------------------------|---------------------------------------|-----------------------------------------|------------------------------------|
| Linear Model                            | 55.6                                  | 49.6                                    | 52.3                               |
| Random intercept only                   | 56.4                                  | 51.3                                    | 53.8                               |
| Random intercept +<br>random slope for: |                                       |                                         |                                    |
| TRAFNEAR                                | 55.8                                  | 52.3                                    | 53.3                               |
| POPEEA_1000                             | 57.1                                  | 52.7                                    | 53.3                               |
| INDUSTRY_5000                           | 31.8                                  | 9.3                                     | 6.8                                |
| MAJORROADLENGTH_100                     | 57.6                                  | 50.7                                    | 51.1                               |
| TRAFLOAD_1000                           | 56.6                                  | 51.1                                    | 53.7                               |
| HDLRES_5000                             | 57.2                                  | 49.7                                    | 53.0                               |
| POPEEA_300                              | 56.7                                  | 51.6                                    | 54.1                               |

Based on these findings, a LME model with random intercepts for area seems to be the best approach for predicting UFP variation at independent sites. The predictors where a significant better model fit was observed in the test sites when applying a random slope per area, did not provide a better UFP prediction in independent sites. To prevent overfitting of the model, a model that only accounts for background UFP differences is preferred, applying the LME with random intercepts per area for UFP predictions at a combined level.

**Figure S7;** The effects for RANDOM SLOPES, while other predictors remain a fixed effect

**A) TRAFNEAR**

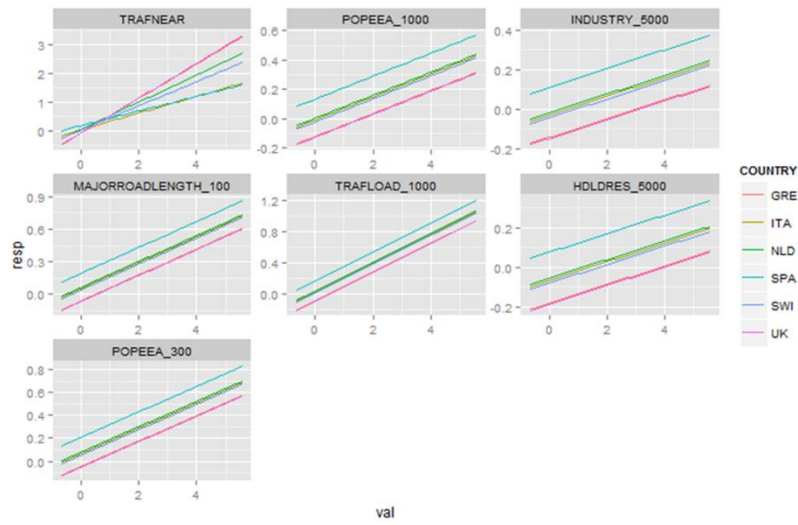

**B) POPEEA\_5000**

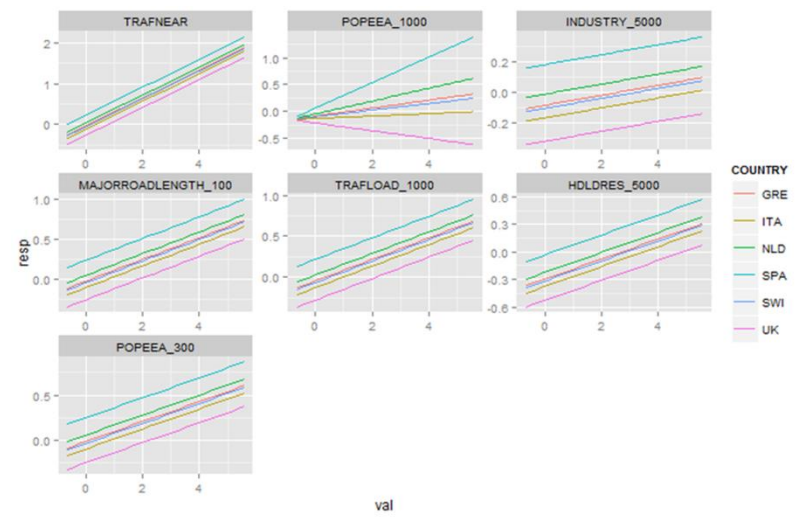

**C) INDUSTRY\_5000**

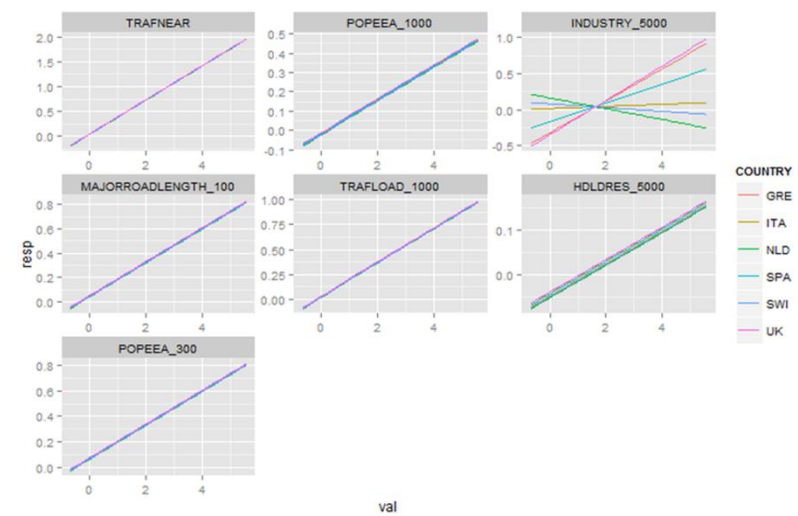



D) MAJORROADLENGTH\_100

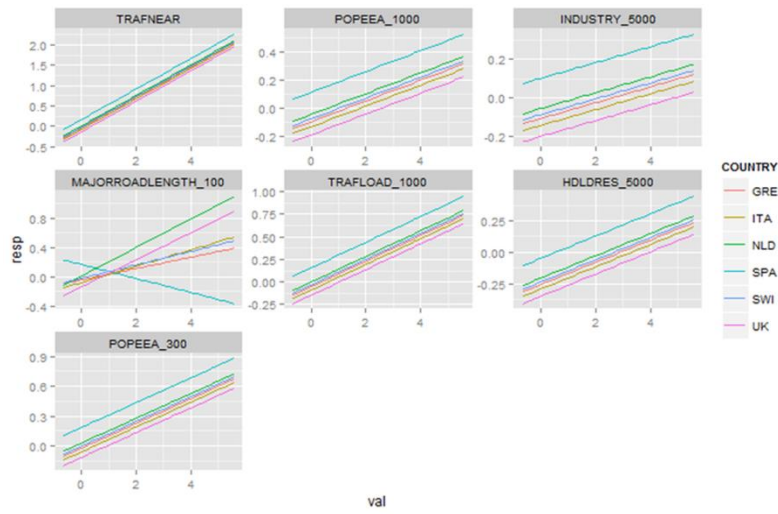

E) TRAFLOAD\_1000

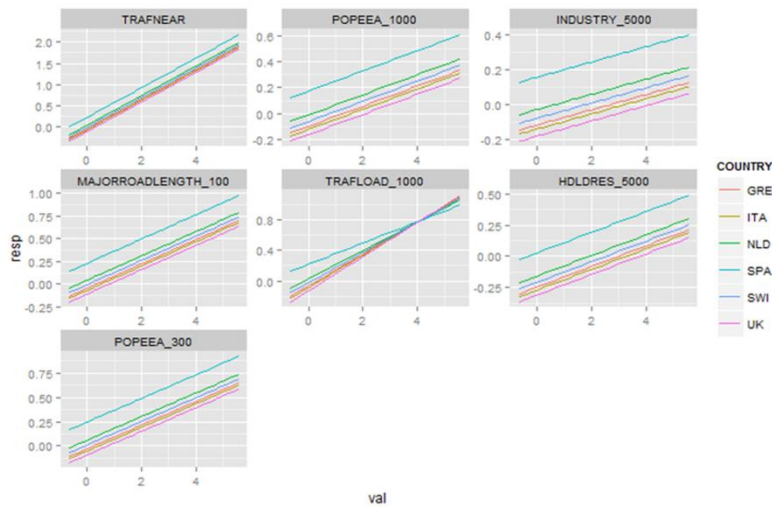

F) HDLDRES\_5000

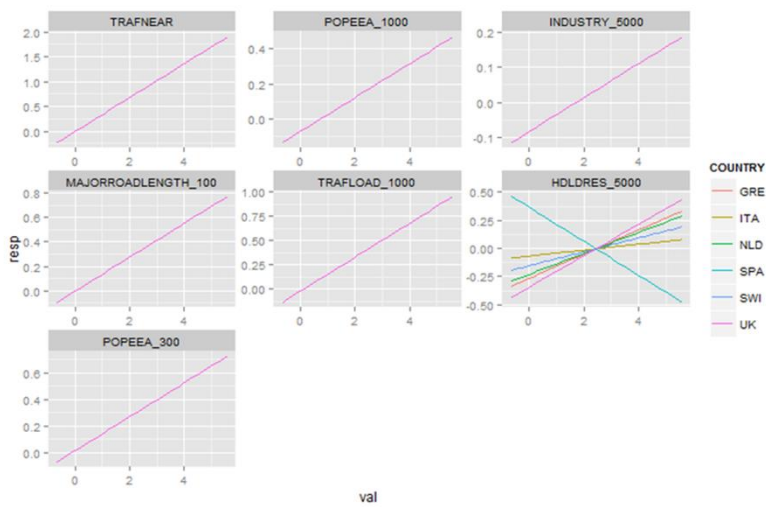

G) POPEEA\_300

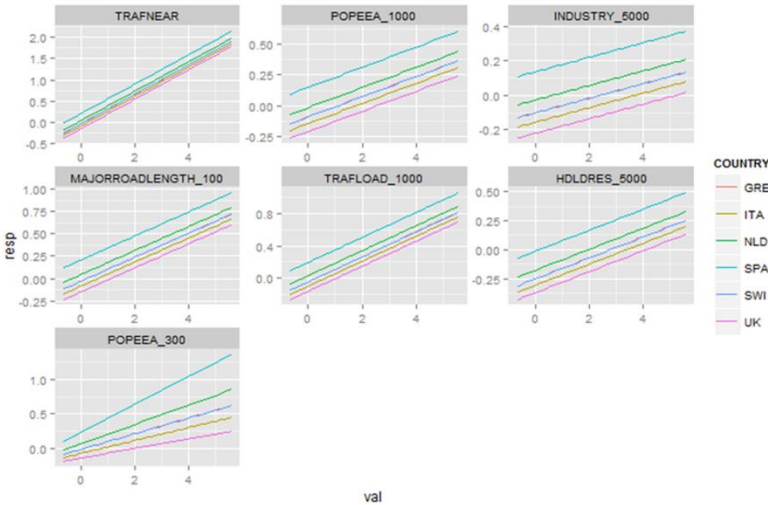

## Supplement 9; Leave One Area Out LUR models

- Leave One Area Out (LOAO) models per area and were developed on all short-term monitoring sites, except one area. Model structures per excluded area are presented below;
- A predictor was used when there was at least 10% representation over monitoring sites (90<sup>th</sup> percentile differed from 0). In addition for EU models, a predictor had to be represented in 3 or more ( $\geq 50\%$ ) of study areas;
- Predictor coefficients presented are multiplied by the spread in the specific predictor, calculated as the 90<sup>th</sup> – 10<sup>th</sup> percentile, expressing the proportional change in UFP for an increase between the 10<sup>th</sup> and 90<sup>th</sup> percentile of the predictor;
- Predictor categories are presented in the first column; (NT = Nearby Traffic, DT = Distant Traffic, PP = Population, IN = Industry).

**Table S9;** Model structures of models based on all short-term sites except one area

| <b>LOAO model</b><br>Based on all short-term sites, except sites from one area                           | <b>UFP</b><br>(90th-10th<br>percentile)<br><b>BASEL</b><br><b>excluded</b> | <b>UFP</b><br>(90th-10th<br>percentile)<br><b>HERAKLION</b><br><b>excluded</b> | <b>UFP</b><br>(90th-10th<br>percentile)<br><b>NETHERLANDS</b><br><b>excluded</b> | <b>UFP</b><br>(90th-10th<br>percentile)<br><b>NORWICH</b><br><b>excluded</b> | <b>UFP</b><br>(90th-10th<br>percentile)<br><b>SABADELL</b><br><b>excluded</b> | <b>UFP</b><br>(90th-10th<br>percentile)<br><b>TURIN</b><br><b>excluded</b> |
|----------------------------------------------------------------------------------------------------------|----------------------------------------------------------------------------|--------------------------------------------------------------------------------|----------------------------------------------------------------------------------|------------------------------------------------------------------------------|-------------------------------------------------------------------------------|----------------------------------------------------------------------------|
| Intercept                                                                                                | <b>7009</b>                                                                | <b>8506</b>                                                                    | <b>4943</b>                                                                      | <b>6946</b>                                                                  | <b>7517</b>                                                                   | <b>6018</b>                                                                |
| NT Traffic intensity on nearest road                                                                     | <b>4897*</b><br>(21895)                                                    | <b>4419</b><br>(22111)                                                         | <b>4943</b><br>(21735)                                                           | <b>4747</b><br>(21097)                                                       | <b>3876</b><br>(18881)                                                        | <b>4871</b><br>(17698)                                                     |
| NT Traffic total load of roads in a buffer of 50m (sum of(traffic intensity * length of all segments))   |                                                                            |                                                                                |                                                                                  |                                                                              | <b>1941</b><br>(2.559e6)                                                      |                                                                            |
| NT Road length of all roads in a buffer of 50m                                                           |                                                                            |                                                                                |                                                                                  |                                                                              |                                                                               | <b>1066</b><br>(201.6)                                                     |
| NT Road length of all major roads in a buffer of 50m                                                     |                                                                            | <b>2139</b><br>(100.0)                                                         | <b>1350</b><br>(99.8)                                                            |                                                                              | <b>1382</b><br>(100.1)                                                        |                                                                            |
| NT Road length of all major roads in a buffer of 100m                                                    | <b>2155</b><br>(258.5)                                                     |                                                                                |                                                                                  | <b>1961</b><br>(266.3)                                                       |                                                                               | <b>1428</b><br>(272.1)                                                     |
| DT Traffic total load of roads in a buffer of 1000m (sum of(traffic intensity * length of all segments)) | <b>1531</b><br>(5.107e8)                                                   | <b>1776</b><br>(5.149e8)                                                       | <b>610</b><br>(5.129e8)                                                          | <b>1430</b><br>(4.655e8)                                                     |                                                                               |                                                                            |
| DT Road length of all roads in a buffer of 1000m                                                         |                                                                            |                                                                                | <b>2448</b><br>(51635)                                                           |                                                                              |                                                                               |                                                                            |
| PP Population land use in a buffer of 300m                                                               |                                                                            |                                                                                | <b>1222</b><br>(5778)                                                            | <b>1492</b><br>(5512)                                                        | <b>1431</b><br>(5443)                                                         |                                                                            |
| PP Population land use in a buffer of 1000m                                                              | <b>2190</b><br>(48736)                                                     | <b>3938</b><br>(39697)                                                         |                                                                                  |                                                                              |                                                                               | <b>2201</b><br>(43863)                                                     |
| PP Population land use in a buffer of 5000m                                                              | <b>2482</b><br>(463857)                                                    |                                                                                |                                                                                  |                                                                              | <b>3572</b><br>(463857)                                                       | <b>2026</b><br>(233063)                                                    |
| PP Sum of low and high density residential land in a buffer of 1000m                                     |                                                                            |                                                                                | <b>1164</b><br>(1.927e6)                                                         | <b>2413</b><br>(1.990e6)                                                     |                                                                               |                                                                            |
| IN Industry within a buffer of 300m                                                                      |                                                                            | <b>148</b><br>(13574)                                                          |                                                                                  |                                                                              |                                                                               |                                                                            |
| IN Industry within a buffer of 5000m                                                                     | <b>1470</b><br>(8.056e6)                                                   |                                                                                | <b>2991</b><br>(7.906e6)                                                         | <b>994</b><br>(7.101e6)                                                      |                                                                               | <b>1353</b><br>(6.49e6)                                                    |

Leave One Area Out (LOAO) models; developed on all short-term sites except the sites from the area listed in the column  
NT = Nearby Traffic, DT = Distant Traffic, PP = Population, IN = Industry  
\* All presented coefficients are Model coefficients multiplied by the value of the 10<sup>th</sup>-90<sup>th</sup> percentile of the predictor
